# Supplementary material for: Seasonal Variation of Glucosinolate Hydrolysis Products in Commercial White and Red Cabbages (Brassica oleracea var. capitata)
Source: MDPI journal article supplement (doi:10.3390/foods9111682), 2020-11-17
Supplement: s1 [file s1]

Abbreviations: AV: average; SD: standard deviation; ITC: isothiocyanate; ON: cyanide; ETN: epithionitrile; Allyl: allyl GHS; 3Bt: 3-butenyl GHS; 2OH3Bt: 2-hydroxy-3-butenyl GHS; 3MTP: 3-(methylsulfinyl)pentanenitrile; 3BtUT: 3-butenyl ITC; CETB: 1-cyano-3,4-epithiobutane; 2OH3Bt-CON: 3-hydroxy-pentanenitrile; CHETB: 1-cyano-2,4-epithiobutane A/B; OZT: 5-vinylacetoindole-2-thione (methylsulfinyl)pentanenitrile; 4MSOB-ITC: 4-(methylsulfinyl)butyl ITC; 5MSOP-ITC: 5-(methylsulfinyl)pentyl ITC; 2-PE-ON: 3-phenylpropanenitrile; 2-PE-ITC: 2-phenylethyl ITC; In: isole; d: dextro; l: levo; ac: acetonitrile

[illegible]
