# Supplementary material for: Seasonal Variation of Glucosinolate Hydrolysis Products in Commercial White and Red Cabbages (Brassica oleracea var. capitata)
Source: MDPI journal article supplement (doi:10.3390/foods9111682), 2020-11-17
Supplement: s1 [file s1]

**Table S4: Climatic data of the Dithmarschen region in northern Germany in 2019. Abbreviation: AV: average.**

Elpersbüttel (Dithmarschen, Schleswig-Holstein), Germany

source: <https://www.wetterkontor.de/de/wetter/deutschland/rueckblick.asp?id=52>, accessed 05.11.2020

| 2019      | AV T (min) [°C] | AV T (max) [°C] | AV T (average) [°C] | precipitation per month (L/m <sup>2</sup> ) | AV sunshine (h/d) | AV Wind (Bft) |
|-----------|-----------------|-----------------|---------------------|---------------------------------------------|-------------------|---------------|
| May       | 6.2             | 15.0            | 11.0                | 39.1                                        | 6.7               | 6.0           |
| June      | 11.8            | 23.0            | 17.7                | 66.3                                        | 8.9               | 5.6           |
| July      | 14.0            | 21.5            | 17.6                | 43.3                                        | 5.9               | 5.8           |
| August    | 13.5            | 23.3            | 18.5                | 51.9                                        | 7.3               | 5.6           |
| September | 10.7            | 18.2            | 14.5                | 117.7                                       | 4.8               | 6.0           |
| October   | 7.4             | 13.8            | 10.6                | 92.9                                        | 3.1               | 5.7           |
| November  | 3.4             | 8.1             | 5.9                 | 64.8                                        | 1.3               | 5.2           |
