# Supplementary material for: Seasonal Variation of Glucosinolate Hydrolysis Products in Commercial White and Red Cabbages (Brassica oleracea var. capitata)
Source: MDPI journal article supplement (doi:10.3390/foods9111682), 2020-11-17
Supplement: s1 [file s1]

Table S2: Glucosinolates (GLSs) content in commercial and cabbages harvested freshly from the field in µmol/g fresh weight.

Abbreviations: AV: average; SD: standard deviation; Allyl: allyl GLS; 3But: 3-butenyl GLS; 2OH3But: 2-(R)-2-hydroxy-3-butenyl GLS; 3MTP: 3-(methylsulfonyl)propyl GLS; 3MSOP: 3-(methylsulfonyl)propyl GLS; 4MTB: 4-(methylsulfonyl)butyl GLS; 4MSOB: 4-(methylsulfonyl)butyl GLS; 2PE: 2-phenylethyl GLS; 4OH13M: 4-hydroxyindol-3-ylmethyl GLS; 13M: indol-3-ylmethyl GLS; 4MO13M: 4-methoxyindol-3-yl-methyl GLS; 1MO13M: 1-methoxyindol-3-ylmethyl GLS

|                  | Variety       | Sampling                       |    | Allyl  | 3But   | 2OH3But | 3MTP   | 3MSOP  | 4MTB   | 4MSOB  | 2PE    | 4OH13M | 13M    | 4MO13M | 1MO13M |
|------------------|---------------|--------------------------------|----|--------|--------|---------|--------|--------|--------|--------|--------|--------|--------|--------|--------|
| CON <sub>1</sub> | white cabbage | S1                             | AV | 0.3331 | 0.0930 | 0.1399  | 0.0286 | 0.1937 | 0.0053 | 0.0993 | 0.0079 | 0.0113 | 0.3119 | 0.0260 | 0.0209 |
|                  |               |                                | SD | 0.0398 | 0.0178 | 0.0203  | 0.0027 | 0.0583 | 0.0017 | 0.0332 | 0.0030 | 0.0042 | 0.0413 | 0.0054 | 0.0064 |
| CON <sub>1</sub> | white cabbage | S2                             | AV | 0.5326 | 0.1849 | 0.2121  | 0.0290 | 0.1829 | 0.0046 | 0.0775 | 0.0077 | 0.0160 | 0.2512 | 0.0309 | 0.0309 |
|                  |               |                                | SD | 0.1835 | 0.0317 | 0.0092  | 0.0092 | 0.0408 | 0.0017 | 0.0285 | 0.0033 | 0.0085 | 0.0294 | 0.0040 | 0.0098 |
| CON <sub>1</sub> | white cabbage | S3                             | AV | 0.4945 | 0.0488 | 0.1253  | 0.0806 | 0.2479 | 0.0361 | 0.0590 | 0.0266 | 0.0018 | 0.2644 | 0.0410 | 0.0158 |
|                  |               |                                | SD | 0.1410 | 0.0252 | 0.0693  | 0.0173 | 0.0290 | 0.0203 | 0.0166 | 0.0032 | 0.0002 | 0.0514 | 0.0083 | 0.0057 |
| CON <sub>1</sub> | white cabbage | S4                             | AV | 0.4838 | 0.0356 | 0.0277  | 0.0368 | 0.4490 | 0.0014 | 0.0138 | 0.0042 | 0.0055 | 0.2410 | 0.0167 | 0.0101 |
|                  |               |                                | SD | 0.0851 | 0.0434 | 0.0092  | 0.0176 | 0.0425 | 0.0007 | 0.0043 | 0.0032 | 0.0038 | 0.0544 | 0.0057 | 0.0069 |
| CON <sub>1</sub> | white cabbage | S5                             | AV | 0.7121 | 0.0086 | 0.0255  | 0.0670 | 0.6110 | 0.0020 | 0.0189 | 0.0058 | 0.0188 | 0.2366 | 0.0320 | 0.0122 |
|                  |               |                                | SD | 0.0200 | 0.0008 | 0.0030  | 0.0135 | 0.0825 | 0.0000 | 0.0035 | 0.0007 | 0.0035 | 0.0436 | 0.0021 | 0.0027 |
| CON <sub>1</sub> | white cabbage | S6                             | AV | 0.2531 | 0.0548 | 0.1617  | 0.0274 | 0.3696 | 0.0085 | 0.2013 | 0.0046 | 0.0111 | 0.3239 | 0.0271 | 0.0160 |
|                  |               |                                | SD | 0.0567 | 0.0126 | 0.0230  | 0.0040 | 0.0176 | 0.0037 | 0.0141 | 0.0010 | 0.0006 | 0.0464 | 0.0057 | 0.0043 |
| CON <sub>2</sub> | white cabbage | S1                             | AV | 0.1668 | 0.0253 | 0.0507  | 0.0237 | 0.2709 | 0.0054 | 0.0662 | 0.0052 | 0.0106 | 0.1873 | 0.0233 | 0.0084 |
|                  |               |                                | SD | 0.0287 | 0.0055 | 0.0184  | 0.0072 | 0.0560 | 0.0033 | 0.0150 | 0.0027 | 0.0017 | 0.0552 | 0.0062 | 0.0023 |
| CON <sub>2</sub> | white cabbage | S2                             | AV | 0.3621 | 0.0303 | 0.0409  | 0.0460 | 0.4363 | 0.0155 | 0.0699 | 0.0063 | 0.0205 | 0.0683 | 0.0238 | 0.0069 |
|                  |               |                                | SD | 0.0652 | 0.0161 | 0.0183  | 0.0132 | 0.0895 | 0.0048 | 0.0362 | 0.0027 | 0.0055 | 0.0075 | 0.0017 | 0.0009 |
| CON <sub>2</sub> | white cabbage | S3                             | AV | 0.3429 | 0.0249 | 0.0708  | 0.0277 | 0.3426 | 0.0035 | 0.0452 | 0.0076 | 0.0154 | 0.2174 | 0.0384 | 0.0088 |
|                  |               |                                | SD | 0.2886 | 0.0118 | 0.0344  | 0.0155 | 0.2121 | 0.0011 | 0.0252 | 0.0020 | 0.0059 | 0.0384 | 0.0020 | 0.0046 |
| CON <sub>2</sub> | white cabbage | S4                             | AV | 0.5646 | 0.0061 | 0.0192  | 0.0480 | 0.4633 | 0.0012 | 0.0122 | 0.0051 | 0.0146 | 0.2108 | 0.0299 | 0.0145 |
|                  |               |                                | SD | 0.0453 | 0.0010 | 0.0030  | 0.0087 | 0.0119 | 0.0002 | 0.0012 | 0.0008 | 0.0056 | 0.0151 | 0.0061 | 0.0024 |
| CON <sub>2</sub> | white cabbage | S5                             | AV | 0.4096 | 0.0450 | 0.0809  | 0.0426 | 0.2327 | 0.0034 | 0.0287 | 0.0061 | 0.0250 | 0.2048 | 0.0310 | 0.0118 |
|                  |               |                                | SD | 0.0542 | 0.0121 | 0.0444  | 0.0092 | 0.0841 | 0.0004 | 0.0174 | 0.0001 | 0.0085 | 0.0679 | 0.0088 | 0.0046 |
| CON <sub>2</sub> | white cabbage | S6                             | AV | 0.6090 | 0.0928 | 0.1656  | 0.0492 | 0.3791 | 0.0072 | 0.0569 | 0.0062 | 0.0238 | 0.1913 | 0.0310 | 0.0096 |
|                  |               |                                | SD | 0.0687 | 0.0195 | 0.0187  | 0.0052 | 0.0208 | 0.0017 | 0.0096 | 0.0005 | 0.0052 | 0.0352 | 0.0080 | 0.0013 |
| ORG <sub>1</sub> | white cabbage | S1                             | AV | 0.4343 | 0.0263 | 0.0565  | 0.0716 | 0.6395 | 0.0089 | 0.0740 | 0.0046 | 0.0198 | 0.2104 | 0.0616 | 0.0074 |
|                  |               |                                | SD | 0.0981 | 0.0035 | 0.0144  | 0.0243 | 0.1654 | 0.0049 | 0.0250 | 0.0028 | 0.0062 | 0.0158 | 0.0106 | 0.0023 |
| ORG <sub>1</sub> | white cabbage | S2                             | AV | 0.3254 | 0.0193 | 0.0305  | 0.0385 | 0.3387 | 0.0000 | 0.0327 | 0.0013 | 0.0185 | 0.3133 | 0.0197 | 0.0277 |
|                  |               |                                | SD | 0.1490 | 0.0123 | 0.0126  | 0.0316 | 0.2770 | 0.0000 | 0.0396 | 0.0022 | 0.0098 | 0.0853 | 0.0057 | 0.0108 |
| ORG <sub>1</sub> | white cabbage | S3                             | AV | 0.2746 | 0.0313 | 0.0401  | 0.0202 | 0.2971 | 0.0026 | 0.0522 | 0.0066 | 0.0077 | 0.3176 | 0.0156 | 0.0411 |
|                  |               |                                | SD | 0.0686 | 0.0112 | 0.0123  | 0.0063 | 0.0520 | 0.0019 | 0.0068 | 0.0019 | 0.0015 | 0.0323 | 0.0017 | 0.0084 |
| ORG <sub>1</sub> | white cabbage | S4                             | AV | 0.3001 | 0.0142 | 0.0538  | 0.0150 | 0.3426 | 0.0017 | 0.0371 | 0.0093 | 0.0042 | 0.4923 | 0.0421 | 0.0335 |
|                  |               |                                | SD | 0.0252 | 0.0022 | 0.0070  | 0.0047 | 0.0661 | 0.0011 | 0.0094 | 0.0018 | 0.0015 | 0.1229 | 0.0084 | 0.0105 |
| ORG <sub>1</sub> | white cabbage | S5                             | AV | 0.2372 | 0.0295 | 0.0435  | 0.0204 | 0.3091 | 0.0045 | 0.0566 | 0.0061 | 0.0074 | 0.2475 | 0.0145 | 0.0331 |
|                  |               |                                | SD | 0.1580 | 0.0239 | 0.0344  | 0.0098 | 0.1213 | 0.0051 | 0.0310 | 0.0025 | 0.0012 | 0.0693 | 0.0052 | 0.0070 |
| ORG <sub>1</sub> | white cabbage | S6                             | AV | 0.1755 | 0.0211 | 0.0280  | 0.0442 | 0.2496 | 0.0125 | 0.0429 | 0.0060 | 0.0101 | 0.2272 | 0.0119 | 0.0285 |
|                  |               |                                | SD | 0.0097 | 0.0018 | 0.0064  | 0.0132 | 0.0208 | 0.0098 | 0.0062 | 0.0015 | 0.0017 | 0.0336 | 0.0013 | 0.0013 |
| IGZ              | white cabbage | Dottenfelder Dauer, 29.10.2019 | AV | 1.0083 | 0.0129 | 0.0331  | 0.1379 | 1.0107 | 0.0027 | 0.0172 | 0.0043 | 0.0183 | 0.1854 | 0.0592 | 0.0242 |
|                  |               |                                | SD | 0.1846 | 0.0007 | 0.0175  | 0.0734 | 0.2371 | 0.0010 | 0.0071 | 0.0023 | 0.0050 | 0.0619 | 0.0124 | 0.0082 |
| CON <sub>1</sub> | red cabbage   | S1                             | AV | 0.2703 | 0.4966 | 0.9892  | 0.0208 | 0.1906 | 0.0751 | 0.9259 | 0.0149 | 0.0337 | 0.2474 | 0.0392 | 0.0086 |
|                  |               |                                | SD | 0.0379 | 0.0903 | 0.1870  | 0.0046 | 0.0253 | 0.0105 | 0.0545 | 0.0026 | 0.0021 | 0.0541 | 0.0078 | 0.0018 |
| CON <sub>1</sub> | red cabbage   | S2                             | AV | 0.2147 | 0.2807 | 0.3993  | 0.0242 | 0.2529 | 0.0621 | 0.3803 | 0.0052 | 0.0465 | 0.2162 | 0.0397 | 0.0079 |
|                  |               |                                | SD | 0.0788 | 0.3613 | 0.5348  | 0.0021 | 0.0399 | 0.0761 | 0.3587 | 0.0090 | 0.0091 | 0.0611 | 0.0096 | 0.0024 |
| CON <sub>1</sub> | red cabbage   | S3                             | AV | 0.2978 | 0.2696 | 0.3531  | 0.0293 | 0.3115 | 0.0623 | 0.3351 | 0.0107 | 0.0391 | 0.2204 | 0.0458 | 0.0045 |
|                  |               |                                | SD | 0.1406 | 0.2494 | 0.3253  | 0.0172 | 0.2297 | 0.0254 | 0.1936 | 0.0034 | 0.0163 | 0.0479 | 0.0136 | 0.0008 |
| CON <sub>1</sub> | red cabbage   | S4                             | AV | 0.2619 | 0.1266 | 0.1579  | 0.0269 | 0.3974 | 0.0385 | 0.2970 | 0.0069 | 0.0381 | 0.2312 | 0.0419 | 0.0054 |
|                  |               |                                | SD | 0.0610 | 0.0244 | 0.0312  | 0.0050 | 0.1478 | 0.0082 | 0.1204 | 0.0011 | 0.0129 | 0.0081 | 0.0105 | 0.0014 |
| CON <sub>1</sub> | red cabbage   | S5                             | AV | 0.3283 | 0.3947 | 0.8451  | 0.0152 | 0.2315 | 0.0667 | 0.5154 | 0.0079 | 0.0179 | 0.1451 | 0.0205 | 0.0044 |
|                  |               |                                | SD | 0.0674 | 0.0507 | 0.1102  | 0.0042 | 0.0450 | 0.0368 | 0.1504 | 0.0018 | 0.0043 | 0.0161 | 0.0049 | 0.0030 |
| CON <sub>1</sub> | red cabbage   | S6                             | AV | 0.2749 | 0.3380 | 0.6089  | 0.0176 | 0.2151 | 0.1122 | 0.6803 | 0.0113 | 0.0198 | 0.3268 | 0.0331 | 0.0164 |
|                  |               |                                | SD | 0.0356 | 0.0510 | 0.0451  | 0.0023 | 0.0375 | 0.0195 | 0.0663 | 0.0011 | 0.0028 | 0.0381 | 0.0050 | 0.0090 |
| CON <sub>2</sub> | red cabbage   | S1                             | AV | 0.2870 | 0.2079 | 0.2267  | 0.0292 | 0.2792 | 0.0729 | 0.3320 | 0.0110 | 0.0135 | 0.1640 | 0.0272 | 0.0083 |
|                  |               |                                | SD | 0.0273 | 0.1304 | 0.0872  | 0.0164 | 0.0421 | 0.0538 | 0.0814 | 0.0026 | 0.0043 | 0.1043 | 0.0048 | 0.0041 |
| CON <sub>2</sub> | red cabbage   | S2                             | AV | 0.1673 | 0.0584 | 0.0843  | 0.0151 | 0.1653 | 0.0186 | 0.0969 | 0.0000 | 0.0250 | 0.2407 | 0.0339 | 0.0087 |
|                  |               |                                | SD | 0.0070 | 0.0239 | 0.0035  | 0.0043 | 0.0493 | 0.0078 | 0.0353 | 0.0000 | 0.0010 | 0.0753 | 0.0029 | 0.0016 |
| CON <sub>2</sub> | red cabbage   | S3                             | AV | 0.1847 | 0.3671 | 0.4020  | 0.0104 | 0.1330 | 0.0309 | 0.4235 | 0.0137 | 0.0237 | 0.2428 | 0.0348 | 0.0098 |
|                  |               |                                | SD | 0.0932 | 0.2695 | 0.2511  | 0.0056 | 0.0475 | 0.0185 | 0.0884 | 0.0027 | 0.0145 | 0.1718 | 0.0017 | 0.0082 |
| CON <sub>2</sub> | red cabbage   | S4                             | AV | 0.2265 | 0.1443 | 0.1774  | 0.0083 | 0.1888 | 0.0143 | 0.2931 | 0.0056 | 0.0187 | 0.2095 | 0.0291 | 0.0048 |
|                  |               |                                | SD | 0.0735 | 0.0599 | 0.1462  | 0.0027 | 0.1135 | 0.0051 | 0.2303 | 0.0018 | 0.0189 | 0.0366 | 0.0235 | 0.0014 |
| CON <sub>2</sub> | red cabbage   | S5                             | AV | 0.3504 | 0.3254 | 0.5161  | 0.0156 | 0.1687 | 0.0393 | 0.3213 | 0.0095 | 0.0221 | 0.1372 | 0.0285 | 0.0028 |
|                  |               |                                | SD | 0.1614 | 0.2206 | 0.3374  | 0.0071 | 0.0567 | 0.0256 | 0.1463 | 0.0039 | 0.0086 | 0.0647 | 0.0090 | 0.0007 |
| CON <sub>2</sub> | red cabbage   | S6                             | AV | 0.2946 | 0.1373 | 0.2144  | 0.0197 | 0.2001 | 0.0469 | 0.2049 | 0.0109 | 0.0218 | 0.1431 | 0.0576 | 0.0050 |
|                  |               |                                | SD | 0.0173 | 0.0555 | 0.0668  | 0.0023 | 0.0427 | 0.0279 | 0.0703 | 0.0005 | 0.0024 | 0.0106 | 0.0270 | 0.0029 |
| ORG <sub>1</sub> | red cabbage   | S1                             | AV | 0.1928 | 0.0473 | 0.0969  | 0.0165 | 0.1928 | 0.0075 | 0.1649 | 0.0053 | 0.0069 | 0.3483 | 0.0335 | 0.0115 |
|                  |               |                                | SD | 0.0198 | 0.0026 | 0.0236  | 0.0030 | 0.0284 | 0.0025 | 0.0339 | 0.0013 | 0.0012 | 0.0952 | 0.0086 | 0.0004 |
| ORG <sub>1</sub> | red cabbage   | S2                             | AV | 0.2452 | 0.0642 | 0.1518  | 0.0155 | 0.2064 | 0.0065 | 0.2061 | 0.0028 | 0.0099 | 0.4924 | 0.0387 | 0.0109 |
|                  |               |                                | SD | 0.0307 | 0.0306 | 0.0297  | 0.0006 | 0.0381 | 0.0025 | 0.0385 | 0.0048 | 0.0004 | 0.0649 | 0.0019 | 0.0018 |
| ORG <sub>1</sub> | red cabbage   | S3                             | AV | 0.2698 | 0.2289 | 0.3942  | 0.0129 | 0.2319 | 0.0176 | 0.3442 | 0.0080 | 0.0284 | 0.3409 | 0.0272 | 0.0115 |
|                  |               |                                | SD | 0.2182 | 0.3188 | 0.5544  | 0.0083 | 0.0921 | 0.0116 | 0.3070 | 0.0042 | 0.0069 | 0.1070 | 0.0029 | 0.0062 |
| ORG <sub>1</sub> | red cabbage   | S4                             | AV | 0.1663 | 0.0545 | 0.0393  | 0.0151 | 0.1447 | 0.0165 | 0.1007 | 0.0060 | 0.0145 | 0.2290 | 0.0279 | 0.0100 |
|                  |               |                                | SD | 0.0468 | 0.0262 | 0.0266  | 0.0078 | 0.0730 | 0.0193 | 0.0880 | 0.0033 | 0.0065 | 0.0539 | 0.0101 | 0.0047 |
| ORG <sub>1</sub> | red cabbage   | S5                             | AV | 0.0695 | 0.0688 | 0.0956  | 0.0127 | 0.1226 | 0.0199 | 0.1888 | 0.0028 | 0.0098 | 0.3434 | 0.0140 | 0.0169 |
|                  |               |                                | SD | 0.0363 | 0.0229 | 0.0342  | 0.0028 | 0.1107 | 0.0061 | 0.0506 | 0.0018 | 0.0094 | 0.0649 | 0.0054 | 0.0071 |
| ORG <sub>1</sub> | red cabbage   | S6                             | AV | 0.0431 | 0.0715 | 0.0799  | 0.0119 | 0.0573 | 0.0206 | 0.1673 | 0.0030 | 0.0059 | 0.2832 | 0.0128 | 0.0079 |
|                  |               |                                | SD | 0.0121 | 0.0198 | 0.0222  | 0.0034 | 0.0234 | 0.0071 | 0.0558 | 0.0010 | 0.0016 | 0.0492 | 0.0028 | 0.0023 |
| IGZ              | red cabbage   |                                |    |        |        |         |        |        |        |        |        |        |        |        |        |
