# Supplementary material for: Seasonal Variation of Glucosinolate Hydrolysis Products in Commercial White and Red Cabbages (Brassica oleracea var. capitata)
Source: Foods. 2020 Nov 17;9(11):1682. doi: 10.3390/foods9111682 (PMC7698573; doi:10.3390/foods9111682)
Supplement: Supplementary file 1 [file foods-09-01682-s001.zip]

Archive with 9 entries (9 files):
- Figure S1.pdf
- Table S1.pdf
- Table S1.xlsx
- Table S2.pdf
- Table S3.pdf
- Table S4.pdf
- TableS2.xlsx
- TableS3.xlsx
- TableS4.xlsx
