# Supplementary material for: Seasonal Variation of Glucosinolate Hydrolysis Products in Commercial White and Red Cabbages (Brassica oleracea var. capitata)
Source: Foods. 2020 Nov 17;9(11):1682. doi: 10.3390/foods9111682 (PMC7698573; doi:10.3390/foods9111682)
Supplement: Supplementary file 1 [file foods-09-01682-s001.zip › Table S1.xlsx]

## Sheet: Table S1
Supplier		Date of purchase	Cabbage variety	Replicate	Grower	Origin of cultivation	cabbage type	soil type	fertilization	Certification mark	Size and shape	Description	weight [kg]	Harvest/season	long term stored cabbage?	Storage conditions before food retailer	Storage at food retailer	Storage conditions at food retailer
	Table S1: Overview of white and red cabbages purchased from three different food retailers or harvested freshly from the field (Großbeeren, D). The origin and cultivation background of commercial cabbages was investigated by interrogating service staff at supermarkets and by contacting growers.
Supplier	Sample	Date of purchase	Cabbage variety	Replicate	Grower	Origin of cultivation	cabbage type	soil type	fertilization	Certification mark	Size and shape	Description	weight [kg]	Harvest/season	long term stored cabbage?	Lagerungsdauer vor dem Verkauf	Storage at food retailer	Storage conditions at food retailer
CON1	S1	2019-09-04	red cabbage	1	Conventional grower No. 1	DE, 25792, Neuenkirchen	early cabbage	marsh soil	Urea, calcium ammonium nitrate, phosphate and potash	QS-Siegel	small, round	loose leaves, not glossy	no data	August	no	1-2 days 6-8°C, 1-2 days 6°C, then center of distribution	2 days	day and night in vegetable shelf (20 °C with air conditioning)
CON1	S1	2019-09-04	red cabbage	2	Conventional grower No. 1	DE, 25792, Neuenkirchen	early cabbage	marsh soil	Urea, calcium ammonium nitrate, phosphate and potash	QS-Siegel	small, round	loose leaves, not glossy	no data	August	no	1-2 days 6-8°C, 1-2 days 6°C, then center of distribution	2 days	day and night in vegetable shelf (20 °C with air conditioning)
CON1	S1	2019-09-04	red cabbage	3	Conventional grower No. 1	DE, 25792, Neuenkirchen	early cabbage	marsh soil	Urea, calcium ammonium nitrate, phosphate and potash	QS-Siegel	small, round	loose leaves, not glossy	no data	August	no	1-2 days 6-8°C, 1-2 days 6°C, then center of distribution	2 days	day and night in vegetable shelf (20 °C with air conditioning)
CON1	S1	2019-09-04	white cabbage	1	Conventional grower No. 1	DE, 25792, Neuenkirchen	early cabbage	marsh soil	Urea, calcium ammonium nitrate, phosphate and potash	QS-Siegel	big, round	loose leaves, glossy	no data	August	no	1-2 days 6-8°C, 1-2 days 6°C, then center of distribution	2 days	day and night in vegetable shelf (20 °C with air conditioning)
CON1	S1	2019-09-04	white cabbage	2	Conventional grower No. 1	DE, 25792, Neuenkirchen	early cabbage	marsh soil	Urea, calcium ammonium nitrate, phosphate and potash	QS-Siegel	big, round	loose leaves, glossy, with feeding sites	no data	August	no	1-2 days 6-8°C, 1-2 days 6°C, then center of distribution	2 days	day and night in vegetable shelf (20 °C with air conditioning)
CON1	S1	2019-09-04	white cabbage	3	Conventional grower No. 1	DE, 25792, Neuenkirchen	early cabbage	marsh soil	Urea, calcium ammonium nitrate, phosphate and potash	QS-Siegel	big, round	loose leaves, glossy, with hole, damaged	no data	August	no	1-2 days 6-8°C, 1-2 days 6°C, then center of distribution	2 days	day and night in vegetable shelf (20 °C with air conditioning)
CON2	S1	2019-09-05	red cabbage	1	Conventional grower No. 1	DE, 25792, Neuenkirchen	early cabbage	marsh soil	Urea, calcium ammonium nitrate, phosphate and potash	QS-Siegel	medium-size, round	tight leaves	no data	August	no	1-2 days 6-8°C, then center of distribution	2 days	7-10 °C day/night in cooling counter
CON2	S1	2019-09-05	red cabbage	2	Conventional grower No. 1	DE, 25792, Neuenkirchen	early cabbage	marsh soil	Urea, calcium ammonium nitrate, phosphate and potash	QS-Siegel	big, round	damaged	no data	August	no	1-2 days 6-8°C, then center of distribution	2 days	7-10 °C day/night in cooling counter
CON2	S1	2019-09-05	red cabbage	3	Conventional grower No. 1	DE, 25792, Neuenkirchen	early cabbage	marsh soil	Urea, calcium ammonium nitrate, phosphate and potash	QS-Siegel	medium-size, round	old, limp leaves	no data	August	no	1-2 days 6-8°C, then center of distribution	2 days	7-10 °C day/night in cooling counter
CON2	S1	2019-09-05	white cabbage	1	Conventional grower No. 1	DE, 25792, Neuenkirchen	early cabbage	marsh soil	Urea, calcium ammonium nitrate, phosphate and potash	QS-Siegel	big	loose leaves, damaged	no data	August	no	1-2 days 6-8°C, then center of distribution	1 day	7-10 °C day/night in cooling counter
CON2	S1	2019-09-05	white cabbage	2	Conventional grower No. 1	DE, 25792, Neuenkirchen	early cabbage	marsh soil	Urea, calcium ammonium nitrate, phosphate and potash	QS-Siegel	big	glossy leaves	no data	August	no	1-2 days 6-8°C, then center of distribution	1 day	7-10 °C day/night in cooling counter
CON2	S1	2019-09-05	white cabbage	3	Conventional grower No. 1	DE, 25792, Neuenkirchen	early cabbage	marsh soil	Urea, calcium ammonium nitrate, phosphate and potash	QS-Siegel	big	older leaves	no data	August	no	1-2 days 6-8°C, then center of distribution	1 day	7-10 °C day/night in cooling counter
ORG1	S1	2019-09-09	red cabbage	1	Organic grower No. 1	DE, 17237, Blankensee (Mecklenburg)	autumn cabbage, hybrid cultivar	loamy sandy soil	200kg/ha hair-meal pellets	Bioland, EU organic label	big, round	glossy, fresh	2.25158	September	no	1-2 days 2-6 °C , then 1-3 days 4-7°C, then within 48 h to food retailer	0 days	10 °C day/night in cooling counter
ORG1	S1	2019-09-09	red cabbage	2	Organic grower No. 1	DE, 17237, Blankensee (Mecklenburg)	autumn cabbage, hybrid cultivar	loamy sandy soil	200kg/ha hair-meal pellets	Bioland, EU organic label	big, round	tight leaves, one damaged site (white looking)	1.96786	September	no	1-2 days 2-6 °C , then 1-3 days 4-7°C, then within 48 h to food retailer	0 days	10 °C day/night in cooling counter
ORG1	S1	2019-09-09	red cabbage	3	Organic grower No. 1	DE, 17237, Blankensee (Mecklenburg)	autumn cabbage, hybrid cultivar	loamy sandy soil	200kg/ha hair-meal pellets	Bioland, EU organic label	small, oval	tight leaves	1.2337	September	no	1-2 days 2-6 °C , then 1-3 days 4-7°C, then within 48 h to food retailer	0 days	10 °C day/night in cooling counter
ORG1	S1	2019-09-09	white cabbage	1	Organic grower No. 1	DE, 17237, Blankensee (Mecklenburg)	autumn cabbage, hybrid cultivar	loamy sandy soil	200kg/ha hair-meal pellets	Bioland, EU organic label	medium-size, round	limp leaves, brown sites, feeding sites	1.45035	September	no	1-2 days 2-6 °C , then 1-3 days 4-7°C, then within 48 h to food retailer	0 days	10 °C day/night in cooling counter
ORG1	S1	2019-09-09	white cabbage	2	Organic grower No. 1	DE, 17237, Blankensee (Mecklenburg)	autumn cabbage, hybrid cultivar	loamy sandy soil	200kg/ha hair-meal pellets	Bioland, EU organic label	medium-size, round	soft, brown site	1.27167	September	no	1-2 days 2-6 °C , then 1-3 days 4-7°C, then within 48 h to food retailer	0 days	10 °C day/night in cooling counter
ORG1	S1	2019-09-09	white cabbage	3	Organic grower No. 1	DE, 17237, Blankensee (Mecklenburg)	autumn cabbage, hybrid cultivar	loamy sandy soil	200kg/ha hair-meal pellets	Bioland, EU organic label	medium-size, round	with a cut	1.23583	September	no	1-2 days 2-6 °C , then 1-3 days 4-7°C, then within 48 h to food retailer	0 days	10 °C day/night in cooling counter
CON1	S2	2019-09-16	red cabbage	1	Conventional grower No. 1	DE, 25792, Neuenkirchen	autumn cabbage	marsh soil	Urea, calcium ammonium nitrate, phosphate and potash	QS-Siegel	big, round	curled leaves	3.19711	September	no	1-2 days 6°C, then center of distribution (1-2 days)	3 days	day and night in vegetable shelf (20 °C with air conditioning)
CON1	S2	2019-09-16	red cabbage	2	Conventional grower No. 1	DE, 25792, Neuenkirchen	autumn cabbage	marsh soil	Urea, calcium ammonium nitrate, phosphate and potash	QS-Siegel	small, oval	wrinkled	1.62242	September	no	1-2 days 6°C, then center of distribution (1-2 days)	3 days	day and night in vegetable shelf (20 °C with air conditioning)
CON1	S2	2019-09-16	red cabbage	3	Conventional grower No. 1	DE, 25792, Neuenkirchen	autumn cabbage	marsh soil	Urea, calcium ammonium nitrate, phosphate and potash	QS-Siegel	medium-size, round	tight leaves	2.22648	September	no	1-2 days 6°C, then center of distribution (1-2 days)	3 days	day and night in vegetable shelf (20 °C with air conditioning)
CON1	S2	2019-09-16	white cabbage	1	Conventional grower No. 1	DE, 25792, Neuenkirchen	autumn cabbage	marsh soil	Urea, calcium ammonium nitrate, phosphate and potash	QS-Siegel	big, round	slightly damaged	2.87468	September	no	1-2 days 6°C, then center of distribution (1-2 days)	2 days	day and night in vegetable shelf (20 °C with air conditioning)
CON1	S2	2019-09-16	white cabbage	2	Conventional grower No. 1	DE, 25792, Neuenkirchen	autumn cabbage	marsh soil	Urea, calcium ammonium nitrate, phosphate and potash	QS-Siegel	medium-size, round	curled leaves, slightly damaged	2.1391	September	no	1-2 days 6°C, then center of distribution (1-2 days)	2 days	day and night in vegetable shelf (20 °C with air conditioning)
CON1	S2	2019-09-16	white cabbage	3	Conventional grower No. 1	DE, 25792, Neuenkirchen	autumn cabbage	marsh soil	Urea, calcium ammonium nitrate, phosphate and potash	QS-Siegel	medium-size, round	tight leaves	2.3469	September	no	1-2 days 6°C, then center of distribution (1-2 days)	2 days	day and night in vegetable shelf (20 °C with air conditioning)
CON2	S2	2019-09-16	red cabbage	1	Conventional grower No. 1	DE, 25792, Neuenkirchen	autumn cabbage	marsh soil	Urea, calcium ammonium nitrate, phosphate and potash	QS-Siegel	medium-size, round	loose leaves	1.93141	September	no	1-2 days 6-8°C, then center of distribution	4 days	7-10 °C day/night in cooling counter
CON2	S2	2019-09-16	red cabbage	2	Conventional grower No. 1	DE, 25792, Neuenkirchen	autumn cabbage	marsh soil	Urea, calcium ammonium nitrate, phosphate and potash	QS-Siegel	small	tight leaves	1.38883	September	no	1-2 days 6-8°C, then center of distribution	4 days	7-10 °C day/night in cooling counter
CON2	S2	2019-09-16	red cabbage	3	Conventional grower No. 1	DE, 25792, Neuenkirchen	autumn cabbage	marsh soil	Urea, calcium ammonium nitrate, phosphate and potash	QS-Siegel	very small	tight leaves	0.76007	September	no	1-2 days 6-8°C, then center of distribution	4 days	7-10 °C day/night in cooling counter
CON2	S2	2019-09-16	white cabbage	1	Conventional grower No. 1	DE, 25792, Neuenkirchen	autumn cabbage	marsh soil	Urea, calcium ammonium nitrate, phosphate and potash	QS-Siegel	big, round	tight leaves	2.30894	September	no	1-2 days 6-8°C, then center of distribution	4 days	7-10 °C day/night in cooling counter
CON2	S2	2019-09-16	white cabbage	2	Conventional grower No. 1	DE, 25792, Neuenkirchen	autumn cabbage	marsh soil	Urea, calcium ammonium nitrate, phosphate and potash	QS-Siegel	medium-size, round	loose, limp, old leaves	1.96342	September	no	1-2 days 6-8°C, then center of distribution	4 days	7-10 °C day/night in cooling counter
CON2	S2	2019-09-16	white cabbage	3	Conventional grower No. 1	DE, 25792, Neuenkirchen	autumn cabbage	marsh soil	Urea, calcium ammonium nitrate, phosphate and potash	QS-Siegel	big, round	damaged with feeding sites	2.66684	September	no	1-2 days 6-8°C, then center of distribution	4 days	7-10 °C day/night in cooling counter
ORG1	S2	2019-09-19	red cabbage	1	Organic grower No. 2	DE, 25761, Hedwigenkoog	autumn cabbage, seedfast	sea marsh soil	compost	Demeter, EU organic label	small, oval	minor feeding sites, tight leaves, fresh	0.90819	September	no	1-2 days 7-8 °C , then 1-3 days center of distribution, then within 48 h to food retailer	no reliable data, maximum 8 days	10 °C day/night in cooling counter
ORG1	S2	2019-09-19	red cabbage	2	Organic grower No. 2	DE, 25761, Hedwigenkoog	autumn cabbage, seedfast	sea marsh soil	compost	Demeter, EU organic label	small, oval	slightly damaged, tight leaves	0.86882	September	no	1-2 days 7-8 °C , then 1-3 days center of distribution, then within 48 h to food retailer	no reliable data, maximum 8 days	10 °C day/night in cooling counter
ORG1	S2	2019-09-19	red cabbage	3	Organic grower No. 2	DE, 25761, Hedwigenkoog	autumn cabbage, seedfast	sea marsh soil	compost	Demeter, EU organic label	medium-size, oval	soft leaves, undamaged	1.13872	September	no	1-2 days 7-8 °C , then 1-3 days center of distribution, then within 48 h to food retailer	no reliable data, maximum 8 days	10 °C day/night in cooling counter
ORG1	S2	2019-09-19	white cabbage	1	Organic grower No. 2	DE, 25761, Hedwigenkoog	autumn cabbage, seedfast	sea marsh soil	compost	Demeter, EU organic label	small, round	limp leaves, unfresh, with holes, dirty	0.98443	September	no	1-2 days 7-8 °C , then 1-3 days center of distribution, then within 48 h to food retailer	no reliable data, maximum 8 days	10 °C day/night in cooling counter
ORG1	S2	2019-09-19	white cabbage	2	Organic grower No. 2	DE, 25761, Hedwigenkoog	autumn cabbage, seedfast	sea marsh soil	compost	Demeter, EU organic label	medium-size, round	limp leaves, dirty, with holes and feeding sites	1.46645	September	no	1-2 days 7-8 °C , then 1-3 days center of distribution, then within 48 h to food retailer	no reliable data, maximum 8 days	10 °C day/night in cooling counter
ORG1	S2	2019-09-19	white cabbage	3	Organic grower No. 2	DE, 25761, Hedwigenkoog	autumn cabbage, seedfast	sea marsh soil	compost	Demeter, EU organic label	medium-size, round	dirty, tight leaves	1.17129	September	no	1-2 days 7-8 °C , then 1-3 days center of distribution, then within 48 h to food retailer	no reliable data, maximum 8 days	10 °C day/night in cooling counter
CON1	S3	2019-09-30	red cabbage	1	Conventional grower No. 1	DE, 25792, Neuenkirchen	autumn cabbage	marsh soil	Urea, calcium ammonium nitrate, phosphate and potash	QS-Siegel	big, round	loose leaves, wrinkled, soft core, very limp and old	2.49837	September	no	1-2 days 6-8°C, 1-2 days 6°C, then center of distribution	4 days	day and night in vegetable shelf (20 °C with air conditioning)
CON1	S3	2019-09-30	red cabbage	2	Conventional grower No. 1	DE, 25792, Neuenkirchen	autumn cabbage	marsh soil	Urea, calcium ammonium nitrate, phosphate and potash	QS-Siegel	small to medium-size, round	limp, old, unfresh	1.94042	September	no	1-2 days 6-8°C, 1-2 days 6°C, then center of distribution	4 days	day and night in vegetable shelf (20 °C with air conditioning)
CON1	S3	2019-09-30	red cabbage	3	Conventional grower No. 1	DE, 25792, Neuenkirchen	autumn cabbage	marsh soil	Urea, calcium ammonium nitrate, phosphate and potash	QS-Siegel	big, oval	only slightly limp, tighter leaves, with a fresh cut	2.42703	September	no	1-2 days 6-8°C, 1-2 days 6°C, then center of distribution	4 days	day and night in vegetable shelf (20 °C with air conditioning)
CON1	S3	2019-09-30	white cabbage	1	Conventional grower No. 1	DE, 25792, Neuenkirchen	autumn cabbage	marsh soil	Urea, calcium ammonium nitrate, phosphate and potash	QS-Siegel	big, round	brown sites, dirty, curled leaves	3.16302	September	no	1-2 days 6-8°C, 1-2 days 6°C, then center of distribution	4 days	day and night in vegetable shelf (20 °C with air conditioning)
CON1	S3	2019-09-30	white cabbage	2	Conventional grower No. 1	DE, 25792, Neuenkirchen	autumn cabbage	marsh soil	Urea, calcium ammonium nitrate, phosphate and potash	QS-Siegel	big, round	fresh	3.13676	September	no	1-2 days 6-8°C, 1-2 days 6°C, then center of distribution	4 days	day and night in vegetable shelf (20 °C with air conditioning)
CON1	S3	2019-09-30	white cabbage	3	Conventional grower No. 1	DE, 25792, Neuenkirchen	autumn cabbage	marsh soil	Urea, calcium ammonium nitrate, phosphate and potash	QS-Siegel	big, round	brown sites, curled leaves, with feeding sites	2.60419	September	no	1-2 days 6-8°C, 1-2 days 6°C, then center of distribution	4 days	day and night in vegetable shelf (20 °C with air conditioning)
CON2	S3	2019-09-30	red cabbage	1	Conventional grower No. 1	DE, 25792, Neuenkirchen	autumn cabbage	marsh soil	Urea, calcium ammonium nitrate, phosphate and potash	QS-Siegel	medium-size, oval	limp, bit soft feeding site	n.a.	September	no	1-2 days 6-8°C, then center of distribution	3 days	7-10 °C day/night in cooling counter
CON2	S3	2019-09-30	red cabbage	2	Conventional grower No. 1	DE, 25792, Neuenkirchen	autumn cabbage	marsh soil	Urea, calcium ammonium nitrate, phosphate and potash	QS-Siegel	medium-size, oval	curled leaves, old, limp, with a feeding site	2.09954	September	no	1-2 days 6-8°C, then center of distribution	3 days	7-10 °C day/night in cooling counter
CON2	S3	2019-10-01	red cabbage	3	Conventional grower No. 1	DE, 25792, Neuenkirchen	autumn cabbage	marsh soil	Urea, calcium ammonium nitrate, phosphate and potash	QS-Siegel	medium-size, oval	fresh, with a cut	1.28849	September	no	1-2 days 6-8°C, then center of distribution	1 day	7-10 °C day/night in cooling counter
CON2	S3	2019-09-30	white cabbage	1	Conventional grower No. 1	DE, 25792, Neuenkirchen	autumn cabbage	marsh soil	Urea, calcium ammonium nitrate, phosphate and potash	QS-Siegel	small, round	very fresh	1.54911	September	no	1-2 days 6-8°C, then center of distribution	3 days	7-10 °C day/night in cooling counter
CON2	S3	2019-09-30	white cabbage	2	Conventional grower No. 1	DE, 25792, Neuenkirchen	autumn cabbage	marsh soil	Urea, calcium ammonium nitrate, phosphate and potash	QS-Siegel	small, round	very fresh	1.87253	September	no	1-2 days 6-8°C, then center of distribution	3 days	7-10 °C day/night in cooling counter
CON2	S3	2019-09-30	white cabbage	3	Conventional grower No. 1	DE, 25792, Neuenkirchen	autumn cabbage	marsh soil	Urea, calcium ammonium nitrate, phosphate and potash	QS-Siegel	small, round	outside fresh, brown stem	1.735	September	no	1-2 days 6-8°C, then center of distribution	3 days	7-10 °C day/night in cooling counter
ORG1	S3	2019-10-01	red cabbage	1	Organic grower No. 2	DE, 25761, Hedwigenkoog	autumn cabbage, seedfast	sea marsh soil	compost	Demeter, EU organic label	small, round	tight leaves, fresh	1.01816	September	no	1-2 days 7-8 °C , then 1-3 days center of distribution, then within 48 h to food retailer	1-3 days	10 °C day/night in cooling counter
ORG1	S3	2019-10-01	red cabbage	2	Organic grower No. 2	DE, 25761, Hedwigenkoog	autumn cabbage, seedfast	sea marsh soil	compost	Demeter, EU organic label	small, round	older, white site, partly limp	0.73535	September	no	1-2 days 7-8 °C , then 1-3 days center of distribution, then within 48 h to food retailer	1-3 days	10 °C day/night in cooling counter
ORG1	S3	2019-10-01	red cabbage	3	Organic grower No. 2	DE, 25761, Hedwigenkoog	autumn cabbage, seedfast	sea marsh soil	compost	Demeter, EU organic label	small, round	fresh with feeding sites	1.03021	September	no	1-2 days 7-8 °C , then 1-3 days center of distribution, then within 48 h to food retailer	1-3 days	10 °C day/night in cooling counter
ORG1	S3	2019-10-01	white cabbage	1	Organic grower No. 2	DE, 25761, Hedwigenkoog	autumn cabbage, seedfast	sea marsh soil	compost	Demeter, EU organic label	medium-size, round	with holes, slightly damages, loose leaves	1.16629	September	no	1-2 days 7-8 °C , then 1-3 days center of distribution, then within 48 h to food retailer	0 days	10 °C day/night in cooling counter
ORG1	S3	2019-10-01	white cabbage	2	Organic grower No. 2	DE, 25761, Hedwigenkoog	autumn cabbage, seedfast	sea marsh soil	compost	Demeter, EU organic label	small to medium-size, round	tight leaves, fresh	1.14954	September	no	1-2 days 7-8 °C , then 1-3 days center of distribution, then within 48 h to food retailer	0 days	10 °C day/night in cooling counter
ORG1	S3	2019-10-01	white cabbage	3	Organic grower No. 2	DE, 25761, Hedwigenkoog	autumn cabbage, seedfast	sea marsh soil	compost	Demeter, EU organic label	very small	some feeding sites	0.81032	September	no	1-2 days 7-8 °C , then 1-3 days center of distribution, then within 48 h to food retailer	0 days	10 °C day/night in cooling counter
	IGZ	2019-10-10	red cabbage	1	IGZ	DE, 14979, Großbeeren	late cabbage, Redma RZ F1	silty loam	Calcium ammonium nitrate, patentkali	n.a.	medium-size, oval	tight leaves, fresh	1.6393	2019-10-10	no	not applicable	0 days	not applicable
	IGZ	2019-10-10	red cabbage	2	IGZ	DE, 14979, Großbeeren	late cabbage, Redma RZ F2	silty loam	Calcium ammonium nitrate, patentkali	n.a.	medium-size, oval	tight leaves, fresh	1.51794	2019-10-10	no	not applicable	0 days	not applicable
	IGZ	2019-10-10	red cabbage	3	IGZ	DE, 14979, Großbeeren	late cabbage, Redma RZ F3	silty loam	Calcium ammonium nitrate, patentkali	n.a.	medium-size, oval	tight leaves, fresh	1.51544	2019-10-10	no	not applicable	0 days	not applicable
	IGZ	2019-10-10	red cabbage	4	IGZ	DE, 14979, Großbeeren	late cabbage, Redma RZ F4	silty loam	Calcium ammonium nitrate, patentkali	n.a.	medium-size, oval	tight leaves, fresh	1.72372	2019-10-10	no	not applicable	0 days	not applicable
CON1	S4	2019-10-21	red cabbage	1	Conventional grower No. 1	DE, 25792, Neuenkirchen	autumn cabbage	marsh soil	Urea, calcium ammonium nitrate, phosphate and potash	QS-Siegel	big, round	fresh	2.056	October	no	1-2 days 6-8°C, 1-2 days 6°C, then center of distribution	2 days	day and night in vegetable shelf (20 °C with air conditioning)
CON1	S4	2019-10-21	red cabbage	2	Conventional grower No. 1	DE, 25792, Neuenkirchen	autumn cabbage	marsh soil	Urea, calcium ammonium nitrate, phosphate and potash	QS-Siegel	medium-size, round	fresh	1.78	October	no	1-2 days 6-8°C, 1-2 days 6°C, then center of distribution	2 days	day and night in vegetable shelf (20 °C with air conditioning)
CON1	S4	2019-10-21	red cabbage	3	Conventional grower No. 1	DE, 25792, Neuenkirchen	autumn cabbage	marsh soil	Urea, calcium ammonium nitrate, phosphate and potash	QS-Siegel	small, round	minor feeding sites, fresh	1.612	October	no	1-2 days 6-8°C, 1-2 days 6°C, then center of distribution	2 days	day and night in vegetable shelf (20 °C with air conditioning)
CON1	S4	2019-10-21	white cabbage	1	Conventional grower No. 2	DE, 25709, Helse	autumn cabbage, hybrid cultivar	marsh soil	PKS fertilizer (blends), ammonium nitrate and urea (UAN), calcium cyanamide	QS-Siegel	very small, round	fresh	0.874	October	no	1-2 days 6-7°C	2 days	day and night in vegetable shelf (20 °C with air conditioning)
CON1	S4	2019-10-21	white cabbage	2	Conventional grower No. 2	DE, 25709, Helse	autumn cabbage, hybrid cultivar	marsh soil	PKS fertilizer (blends), ammonium nitrate and urea (UAN), calcium cyanamide	QS-Siegel	big, round	fresh, with a cut, dirty	2.066	October	no	1-2 days 6-7°C	2 days	day and night in vegetable shelf (20 °C with air conditioning)
CON1	S4	2019-10-21	white cabbage	3	Conventional grower No. 2	DE, 25709, Helse	autumn cabbage, hybrid cultivar	marsh soil	PKS fertilizer (blends), ammonium nitrate and urea (UAN), calcium cyanamide	QS-Siegel	medium-size, round	fresh	1.716	October	no	1-2 days 6-7°C	2 days	day and night in vegetable shelf (20 °C with air conditioning)
CON2	S4	2019-10-21	red cabbage	1	Conventional grower No. 1	DE, 25792, Neuenkirchen	autumn cabbage	marsh soil	Urea, calcium ammonium nitrate, phosphate and potash	QS-Siegel	medium-size, oval	limp, wrinkly	1.986	October	no	1-2 days 6-8°C, then center of distribution	2 days	7-10 °C day/night in cooling counter
CON2	S4	2019-10-23	red cabbage	2	Conventional grower No. 1	DE, 25792, Neuenkirchen	autumn cabbage	marsh soil	Urea, calcium ammonium nitrate, phosphate and potash	QS-Siegel	small, round	fresh, tight leaves	0.80412	October	no	1-2 days 6-8°C, then center of distribution	2 days	7-10 °C day/night in cooling counter
CON2	S4	2019-10-23	red cabbage	3	Conventional grower No. 1	DE, 25792, Neuenkirchen	autumn cabbage	marsh soil	Urea, calcium ammonium nitrate, phosphate and potash	QS-Siegel	small, round	fresh	1.00002	October	no	1-2 days 6-8°C, then center of distribution	2 days	7-10 °C day/night in cooling counter
CON2	S4	2019-10-21	white cabbage	1	Conventional grower No. 1	DE, 25792, Neuenkirchen	autumn cabbage	marsh soil	Urea, calcium ammonium nitrate, phosphate and potash	QS-Siegel	medium-size, round	fresh	2.13139	October	no	1-2 days 6-8°C, then center of distribution	2 days	7-10 °C day/night in cooling counter
CON2	S4	2019-10-21	white cabbage	2	Conventional grower No. 1	DE, 25792, Neuenkirchen	autumn cabbage	marsh soil	Urea, calcium ammonium nitrate, phosphate and potash	QS-Siegel	medium-size, round	slightly limp, damages sites	1.78299	October	no	1-2 days 6-8°C, then center of distribution	2 days	7-10 °C day/night in cooling counter
CON2	S4	2019-10-21	white cabbage	3	Conventional grower No. 1	DE, 25792, Neuenkirchen	autumn cabbage	marsh soil	Urea, calcium ammonium nitrate, phosphate and potash	QS-Siegel	medium-size, round	fresh	2.25529	October	no	1-2 days 6-8°C, then center of distribution	2 days	7-10 °C day/night in cooling counter
ORG1	S4	2019-10-23	red cabbage	1	Organic grower No. 2	DE, 25761, Hedwigenkoog	autumn cabbage, seedfast	sea marsh soil	compost	Demeter, EU organic label	small to medium-size, round/bumpy	tight leaves, fresh	0.96751	October	no	1-2 days 7-8 °C , then 1-3 days center of distribution, then within 48 h to food retailer	2 days	10 °C day/night in cooling counter
ORG1	S4	2019-10-23	red cabbage	2	Organic grower No. 2	DE, 25761, Hedwigenkoog	autumn cabbage, seedfast	sea marsh soil	compost	Demeter, EU organic label	big, round/bumpy	tight leaves, fresh	1.39598	October	no	1-2 days 7-8 °C , then 1-3 days center of distribution, then within 48 h to food retailer	2 days	10 °C day/night in cooling counter
ORG1	S4	2019-10-23	red cabbage	3	Organic grower No. 2	DE, 25761, Hedwigenkoog	autumn cabbage, seedfast	sea marsh soil	compost	Demeter, EU organic label	small to medium-size, round/bumpy	partly limp	1.08507	October	no	1-2 days 7-8 °C , then 1-3 days center of distribution, then within 48 h to food retailer	2 days	10 °C day/night in cooling counter
ORG1	S4	2019-10-23	white cabbage	1	Organic grower No. 1	DE, 17237, Blankensee (Mecklenburg)	autumn cabbage, not seedfast	loamy sandy soil	200kg/ha hair-meal pellets	Bioland, EU organic label	small, round	fresh	0.92711	October	no	1-2 days 2-6 °C , then 1-3 days 4-7°C, then within 48 h to food retailer	1 day	10 °C day/night in cooling counter
ORG1	S4	2019-10-23	white cabbage	2	Organic grower No. 1	DE, 17237, Blankensee (Mecklenburg)	autumn cabbage, not seedfast	loamy sandy soil	200kg/ha hair-meal pellets	Bioland, EU organic label	small, round	fresh	0.83522	October	no	1-2 days 2-6 °C , then 1-3 days 4-7°C, then within 48 h to food retailer	1 day	10 °C day/night in cooling counter
ORG1	S4	2019-10-23	white cabbage	3	Organic grower No. 1	DE, 17237, Blankensee (Mecklenburg)	autumn cabbage, not seedfast	loamy sandy soil	200kg/ha hair-meal pellets	Bioland, EU organic label	small, round	fresh	0.87379	October	no	1-2 days 2-6 °C , then 1-3 days 4-7°C, then within 48 h to food retailer	1 day	10 °C day/night in cooling counter
	IGZ	2019-10-29	white cabbage	1	IGZ	DE, 14979, Großbeeren	late cabbage, Dottenfelder Dauer (organic seeds)	silty loam	60 kg N/ha, Vinasse	n.a.	medium-size, round	fresh, slightly dirty	1.6936	2019-10-29	no	not applicable	0 days	not applicable
	IGZ	2019-10-29	white cabbage	2	IGZ	DE, 14979, Großbeeren	late cabbage, Dottenfelder Dauer (organic seeds)	silty loam	60 kg N/ha, Vinasse	n.a.	medium-size, round	fresh	1.127	2019-10-29	no	not applicable	0 days	not applicable
	IGZ	2019-10-29	white cabbage	3	IGZ	DE, 14979, Großbeeren	late cabbage, Dottenfelder Dauer (organic seeds)	silty loam	60 kg N/ha, Vinasse	n.a.	small, round	fresh, with feeding sites, slightly red	0.898	2019-10-29	no	not applicable	0 days	not applicable
	IGZ	2019-10-29	white cabbage	4	IGZ	DE, 14979, Großbeeren	late cabbage, Dottenfelder Dauer (organic seeds)	silty loam	60 kg N/ha, Vinasse	n.a.	big, round	fresh, dirty, slightly red	1.9534	2019-10-29	no	not applicable	0 days	not applicable
CON1	S5	2019-11-04	red cabbage	1	Conventional grower No. 2	DE, 25709, Helse	autumn cabbage, hybrid cultivar	marsh soil	PKS fertilizer (blends), ammonium nitrate and urea (UAN), calcium cyanamide	QS-Siegel	big, round	unfresh, dark violett, with a cut	2.434	November	no	1-2 days 6-7°C	2 days	day and night in vegetable shelf (20 °C with air conditioning)
CON1	S5	2019-11-04	red cabbage	2	Conventional grower No. 2	DE, 25709, Helse	autumn cabbage, hybrid cultivar	marsh soil	PKS fertilizer (blends), ammonium nitrate and urea (UAN), calcium cyanamide	QS-Siegel	big, oval	unfresh, with a minor feeding site	2.15	November	no	1-2 days 6-7°C	2 days	day and night in vegetable shelf (20 °C with air conditioning)
CON1	S5	2019-11-04	red cabbage	3	Conventional grower No. 2	DE, 25709, Helse	autumn cabbage, hybrid cultivar	marsh soil	PKS fertilizer (blends), ammonium nitrate and urea (UAN), calcium cyanamide	QS-Siegel	small, round	cut and feeding site, very old and soft core	1.27	November	no	1-2 days 6-7°C	2 days	day and night in vegetable shelf (20 °C with air conditioning)
CON1	S5	2019-11-04	white cabbage	1	Conventional grower No. 1	DE, 25792, Neuenkirchen	late cabbage	marsh soil	Urea, calcium ammonium nitrate, phosphate and potash	QS-Siegel	big, round	fesh, with a feeding site	2.486	November	no	1-2 days 6-8°C, then center of distribution	2 days	day and night in vegetable shelf (20 °C with air conditioning)
CON1	S5	2019-11-04	white cabbage	2	Conventional grower No. 1	DE, 25792, Neuenkirchen	late cabbage	marsh soil	Urea, calcium ammonium nitrate, phosphate and potash	QS-Siegel	medium-size, round	slightly damaged, bit violet	2.098	November	no	1-2 days 6-8°C, then center of distribution	2 days	day and night in vegetable shelf (20 °C with air conditioning)
CON1	S5	2019-11-04	white cabbage	3	Conventional grower No. 1	DE, 25792, Neuenkirchen	late cabbage	marsh soil	Urea, calcium ammonium nitrate, phosphate and potash	QS-Siegel	medium-size, round	fesh, with a feeding site	1.988	November	no	1-2 days 6-8°C, then center of distribution	2 days	day and night in vegetable shelf (20 °C with air conditioning)
CON2	S5	2019-11-04	red cabbage	1	Conventional grower No. 1	DE, 25792, Neuenkirchen	autumn cabbage	marsh soil	Urea, calcium ammonium nitrate, phosphate and potash	QS-Siegel	medium-size, round	fesh, minor feeding sites	1.92	November	no	1-2 days 6-8°C, then center of distribution	2 days	7-10 °C day/night in cooling counter
CON2	S5	2019-11-04	red cabbage	2	Conventional grower No. 1	DE, 25792, Neuenkirchen	autumn cabbage	marsh soil	Urea, calcium ammonium nitrate, phosphate and potash	QS-Siegel	medium-size, round	fresh, slightly limp	2.06	November	no	1-2 days 6-8°C, then center of distribution	2 days	7-10 °C day/night in cooling counter
CON2	S5	2019-11-06	red cabbage	3	Conventional grower No. 1	DE, 25792, Neuenkirchen	autumn cabbage	marsh soil	Urea, calcium ammonium nitrate, phosphate and potash	QS-Siegel	small, round	very fresh, light violet	0.986	November	no	1-2 days 6-8°C, then center of distribution	1 day	7-10 °C day/night in cooling counter
CON2	S5	2019-11-04	white cabbage	1	Conventional grower No. 1	DE, 25792, Neuenkirchen	autumn cabbage	marsh soil	Urea, calcium ammonium nitrate, phosphate and potash	QS-Siegel	medium-size, round	fresh	1.762	November	no	1-2 days 6-8°C, then center of distribution	2 days	7-10 °C day/night in cooling counter
CON2	S5	2019-11-04	white cabbage	2	Conventional grower No. 1	DE, 25792, Neuenkirchen	autumn cabbage	marsh soil	Urea, calcium ammonium nitrate, phosphate and potash	QS-Siegel	medium-size, round	fresh, damaged stem, very deep cut	1.74	November	no	1-2 days 6-8°C, then center of distribution	2 days	7-10 °C day/night in cooling counter
CON2	S5	2019-11-04	white cabbage	3	Conventional grower No. 1	DE, 25792, Neuenkirchen	autumn cabbage	marsh soil	Urea, calcium ammonium nitrate, phosphate and potash	QS-Siegel	n.a.	unfresh, old, damaged sites and feeding sites, deep cut	1.628	November	no	1-2 days 6-8°C, then center of distribution	2 days	7-10 °C day/night in cooling counter
ORG1	S5	2019-11-06	red cabbage	1	Organic grower No. 2	DE, 25761, Hedwigenkoog	autumn cabbage, seedfast	sea marsh soil	compost	Demeter, EU organic label	small, round	frash, dark violett	0.746	November	no	1-2 days 7-8 °C , then 1-3 days center of distribution, then within 48 h to food retailer	2 days	10 °C day/night in cooling counter
ORG1	S5	2019-11-06	red cabbage	2	Organic grower No. 2	DE, 25761, Hedwigenkoog	autumn cabbage, seedfast	sea marsh soil	compost	Demeter, EU organic label	medium-size, round	unfresh, light violett, limp, big holes	1.176	November	no	1-2 days 7-8 °C , then 1-3 days center of distribution, then within 48 h to food retailer	2 days	10 °C day/night in cooling counter
ORG1	S5	2019-11-06	red cabbage	3	Organic grower No. 2	DE, 25761, Hedwigenkoog	autumn cabbage, seedfast	sea marsh soil	compost	Demeter, EU organic label	medium-size, round	unfresh, light violett, limp	1.228	November	no	1-2 days 7-8 °C , then 1-3 days center of distribution, then within 48 h to food retailer	2 days	10 °C day/night in cooling counter
ORG1	S5	2019-11-06	white cabbage	1	Organic grower No. 1	DE, 17237, Blankensee (Mecklenburg)	autumn cabbage, not seedfast	loamy sandy soil	200kg/ha hair-meal pellets	Bioland, EU organic label	very small, round	unfresh	0.79	November	no	1-2 days 2-6 °C , then 1-3 days 4-7°C, then within 48 h to food retailer	2 days	10 °C day/night in cooling counter
ORG1	S5	2019-11-06	white cabbage	2	Organic grower No. 1	DE, 17237, Blankensee (Mecklenburg)	autumn cabbage, not seedfast	loamy sandy soil	200kg/ha hair-meal pellets	Bioland, EU organic label	medium-size, round	older leaves, overall fresh	1.326	November	no	1-2 days 2-6 °C , then 1-3 days 4-7°C, then within 48 h to food retailer	2 days	10 °C day/night in cooling counter
ORG1	S5	2019-11-06	white cabbage	3	Organic grower No. 1	DE, 17237, Blankensee (Mecklenburg)	autumn cabbage, not seedfast	loamy sandy soil	200kg/ha hair-meal pellets	Bioland, EU organic label	very big, round	unfresh, big hole	1.848	November	no	1-2 days 2-6 °C , then 1-3 days 4-7°C, then within 48 h to food retailer	2 days	10 °C day/night in cooling counter
CON1	S6	2019-11-18	red cabbage	1	Conventional grower No. 2	DE, 25709, Helse	autumn cabbage, hybrid cultivar	marsh soil	PKS fertilizer (blends), ammonium nitrate and urea (UAN), calcium cyanamide	QS-Siegel	small, oval	tight dull leaves, fresh	1.184	unknown	yes	refrigerated warehouse 0,1-0,3 °C	2 days	day and night in vegetable shelf (20 °C with air conditioning)
CON1	S6	2019-11-18	red cabbage	2	Conventional grower No. 2	DE, 25709, Helse	autumn cabbage, hybrid cultivar	marsh soil	PKS fertilizer (blends), ammonium nitrate and urea (UAN), calcium cyanamide	QS-Siegel	medium-size, round	tight dull leaves, fresh	1.516	unknown	yes	refrigerated warehouse 0,1-0,3 °C	2 days	day and night in vegetable shelf (20 °C with air conditioning)
CON1	S6	2019-11-18	red cabbage	3	Conventional grower No. 2	DE, 25709, Helse	autumn cabbage, hybrid cultivar	marsh soil	PKS fertilizer (blends), ammonium nitrate and urea (UAN), calcium cyanamide	QS-Siegel	small, round	tight dull leaves, fresh	1.226	unknown	yes	refrigerated warehouse 0,1-0,3 °C	2 days	day and night in vegetable shelf (20 °C with air conditioning)
CON1	S6	2019-11-18	white cabbage	1	Conventional grower No. 1	DE, 25792, Neuenkirchen	late cabbage	marsh soil	Urea, calcium ammonium nitrate, phosphate and potash	QS-Siegel	medium-size, round	fresh, deep cut	1.366	unknown	yes	refrigerated warehouse 0,1-0,3 °C	2 days	day and night in vegetable shelf (20 °C with air conditioning)
CON1	S6	2019-11-18	white cabbage	2	Conventional grower No. 1	DE, 25792, Neuenkirchen	late cabbage	marsh soil	Urea, calcium ammonium nitrate, phosphate and potash	QS-Siegel	medium-size, round	tight leaves, fresh	1.62	unknown	yes	refrigerated warehouse 0,1-0,3 °C	2 days	day and night in vegetable shelf (20 °C with air conditioning)
CON1	S6	2019-11-18	white cabbage	3	Conventional grower No. 1	DE, 25792, Neuenkirchen	late cabbage	marsh soil	Urea, calcium ammonium nitrate, phosphate and potash	QS-Siegel	medium-size, round	tight leaves, fresh	1.416	unknown	yes	refrigerated warehouse 0,1-0,3 °C	2 days	day and night in vegetable shelf (20 °C with air conditioning)
CON2	S6	2019-11-18	red cabbage	1	Conventional grower No. 1	DE, 25792, Neuenkirchen	autumn cabbage	marsh soil	Urea, calcium ammonium nitrate, phosphate and potash	QS-Siegel	medium-size, oval	bit limp, mainly fresh, glossy	1.77	unknown	yes	refrigerated warehouse 0,1-0,3 °C	2 days	7-10 °C day/night in cooling counter
CON2	S6	2019-11-18	red cabbage	2	Conventional grower No. 1	DE, 25792, Neuenkirchen	autumn cabbage	marsh soil	Urea, calcium ammonium nitrate, phosphate and potash	QS-Siegel	big, oval	bit limp, mainly fresh, glossy	1.992	unknown	yes	refrigerated warehouse 0,1-0,3 °C	2 days	7-10 °C day/night in cooling counter
CON2	S6	2019-11-18	red cabbage	3	Conventional grower No. 1	DE, 25792, Neuenkirchen	autumn cabbage	marsh soil	Urea, calcium ammonium nitrate, phosphate and potash	QS-Siegel	big, round	tight leaves, fresh, glossy	2.59	unknown	yes	refrigerated warehouse 0,1-0,3 °C	2 days	7-10 °C day/night in cooling counter
CON2	S6	2019-11-18	white cabbage	1	Conventional grower No. 1	DE, 25792, Neuenkirchen	autumn cabbage	marsh soil	Urea, calcium ammonium nitrate, phosphate and potash	QS-Siegel	medium-size, round	tight leaves, fresh, glossy	1.894	unknown	yes	refrigerated warehouse 0,1-0,3 °C	2 days	7-10 °C day/night in cooling counter
CON2	S6	2019-11-18	white cabbage	2	Conventional grower No. 1	DE, 25792, Neuenkirchen	autumn cabbage	marsh soil	Urea, calcium ammonium nitrate, phosphate and potash	QS-Siegel	medium-size, round	tight leaves, fresh	2.098	unknown	yes	refrigerated warehouse 0,1-0,3 °C	2 days	7-10 °C day/night in cooling counter
CON2	S6	2019-11-18	white cabbage	3	Conventional grower No. 1	DE, 25792, Neuenkirchen	autumn cabbage	marsh soil	Urea, calcium ammonium nitrate, phosphate and potash	QS-Siegel	medium-size, round	tight leaves, fresh	2.202	unknown	yes	refrigerated warehouse 0,1-0,3 °C	2 days	7-10 °C day/night in cooling counter
ORG1	S6	2019-11-18	red cabbage	1	Organic grower No. 3	14715, Seeblick	autumn cabbage, non-hybrid cultivar	loamy sandy soil	compost	Demeter, EU organic label	small, round	fresh	1.02172	unknown	yes	refrigerated warehouse 0,1-0,3 °C	4-5 days	10 °C day/night in cooling counter
ORG1	S6	2019-11-20	red cabbage	2	Organic grower No. 3	14715, Seeblick	autumn cabbage, non-hybrid cultivar	loamy sandy soil	compost	Demeter, EU organic label	small, round	fresh	1.0571	unknown	yes	refrigerated warehouse 0,1-0,3 °C	4-5 days	10 °C day/night in cooling counter
ORG1	S6	2019-11-20	red cabbage	3	Organic grower No. 3	14715, Seeblick	autumn cabbage, non-hybrid cultivar	loamy sandy soil	compost	Demeter, EU organic label	small, round	fresh	0.83135	unknown	yes	refrigerated warehouse 0,1-0,3 °C	4-5 days	10 °C day/night in cooling counter
ORG1	S6	2019-11-20	white cabbage	1	Organic grower No. 4	DE, 15306 Vierlinden	autumn cabbage, hybrid cultivar	loamy sandy soil	hair-meal pellets	Bioland, EU organic label	very big, round	fresh, deep hole	2.38907	unknown	yes	refrigerated warehouse 0,1-0,3 °C	4-5 days	10 °C day/night in cooling counter
ORG1	S6	2019-11-20	white cabbage	2	Organic grower No. 4	DE, 15306 Vierlinden	autumn cabbage, hybrid cultivar	loamy sandy soil	hair-meal pellets	Bioland, EU organic label	big, round	fresh	1.93038	unknown	yes	refrigerated warehouse 0,1-0,3 °C	4-5 days	10 °C day/night in cooling counter
ORG1	S6	2019-11-20	white cabbage	3	Organic grower No. 4	DE, 15306 Vierlinden	autumn cabbage, hybrid cultivar	loamy sandy soil	hair-meal pellets	Bioland, EU organic label	big, round	some small holes	1.96935	unknown	yes	refrigerated warehouse 0,1-0,3 °C	4-5 days	10 °C day/night in cooling counter
