# Supplementary material for: Seasonal Variation of Glucosinolate Hydrolysis Products in Commercial White and Red Cabbages (Brassica oleracea var. capitata)
Source: Foods. 2020 Nov 17;9(11):1682. doi: 10.3390/foods9111682 (PMC7698573; doi:10.3390/foods9111682)
Supplement: Supplementary file 1 [file foods-09-01682-s001.zip › TableS2.xlsx]

## Sheet: Sheet2
Table S2: Glucosinolates (GLSs) content in commercial and cabbages harvested freshly from the field in µmol/g fresh weight.
Abbreviations: AV: average; SD: standard deviation; Allyl: allyl GLS; 3But: 3-butenyl GLS; 2OH3But: 2-(R)-2-hydroxy-3-butenyl GLS; 3MTP: 3-(methylsulfanyl)propyl GLS; 3MSOP: 3-(methylsulfinyl)propyl GLS; 4MTB: 4-(methylsulfanyl)butyl GLS; 4MSOB: 4-(methylsulfinyl)butyl GLS; 2PE: 2-phenylethyl GLS; 4OHI3M: 4-hydroxyindol-3-ylmethyl GLS; I3M: indol-3-ylmethyl GLS; 4MOI3M: 4-methoxyindol-3-yl-methyl…
From	Variety	Sampling		Allyl	3But	2OH3But	3MTP	3MSOP	4MTB	4MSOB	2PE	4OHI3M	I3M	4MOI3M	1MOI3M
CON1	white cabbage	S1	AV	0.333077	0.0930344	0.139893	0.0286188	0.193739	0.00530689	0.0993459	0.00785583	0.0112852	0.311875	0.0260077	0.020906
			SD	0.0398474	0.0177975	0.020251	0.00268815	0.058265	0.00170352	0.0332056	0.0030357	0.00422492	0.0412898	0.00537658	0.00637298
CON1	white cabbage	S2	AV	0.532633	0.18487	0.212138	0.02899	0.182913	0.00459231	0.0775243	0.00773438	0.0159962	0.251204	0.0308831	0.0308825
			SD	0.183522	0.0316956	0.0091584	0.00918074	0.0407577	0.0016537	0.0285474	0.00325209	0.00845485	0.0294467	0.00403725	0.00982051
CON1	white cabbage	S3	AV	0.494523	0.048802	0.125311	0.0806465	0.247869	0.0361186	0.059018	0.0266006	0.00177144	0.264394	0.0409865	0.0158338
			SD	0.141016	0.0251678	0.0692704	0.017318	0.029045	0.0202834	0.0165742	0.00315473	0.000174253	0.0514277	0.0083279	0.00571638
CON1	white cabbage	S4	AV	0.483848	0.035639	0.0277144	0.0368185	0.448974	0.00136516	0.0137543	0.00417882	0.00549819	0.241032	0.0167291	0.0100557
			SD	0.0851445	0.0433735	0.00919391	0.0176242	0.042511	0.000718222	0.00432814	0.00322763	0.00383813	0.0544346	0.00573089	0.00689246
CON1	white cabbage	S5	AV	0.712134	0.00862216	0.0255255	0.066966	0.610973	0.00195329	0.0188987	0.00583683	0.0187674	0.236579	0.032019	0.0122176
			SD	0.0200447	0.000832211	0.00297114	0.0135029	0.0824861	4.19849e-05	0.0035304	0.000748637	0.00351751	0.043629	0.00213572	0.00269908
CON1	white cabbage	S6	AV	0.253054	0.0548281	0.161738	0.0274084	0.369586	0.00847908	0.201321	0.00458526	0.0111294	0.323886	0.0270733	0.016002
			SD	0.0566763	0.0126093	0.022955	0.00401323	0.0175682	0.00370892	0.0140767	0.000963804	0.000647101	0.0463551	0.00574045	0.00433356
CON2	white cabbage	S1	AV	0.166839	0.0252885	0.0506844	0.023693	0.270852	0.00541198	0.0661637	0.00524157	0.010635	0.187254	0.0232637	0.00839555
			SD	0.0286971	0.00549318	0.0184335	0.00716469	0.0560497	0.00333215	0.0150477	0.00265089	0.00171599	0.0551964	0.00615729	0.00227827
CON2	white cabbage	S2	AV	0.362079	0.0302524	0.0409293	0.0460057	0.436332	0.0154946	0.0699372	0.0063408	0.0204554	0.0683447	0.0238073	0.00689573
			SD	0.0652133	0.0160536	0.0182682	0.0132302	0.0895193	0.00484903	0.0362291	0.00267959	0.00553713	0.00752842	0.00170652	0.00089504
CON2	white cabbage	S3	AV	0.342911	0.024892	0.0707933	0.0277487	0.342588	0.00350179	0.0452184	0.00758083	0.0153888	0.217438	0.0384085	0.00882916
			SD	0.288567	0.0117826	0.0343721	0.0155104	0.212142	0.00114561	0.0251735	0.00203654	0.00585935	0.0384472	0.00198527	0.00455478
CON2	white cabbage	S4	AV	0.564633	0.00606011	0.0191919	0.0479619	0.463345	0.00120436	0.0122101	0.00511838	0.0145602	0.210837	0.029877	0.014528
			SD	0.0453337	0.00101101	0.00304441	0.00870339	0.0119044	0.000238735	0.00116554	0.000781782	0.00564947	0.0150759	0.00612371	0.0023849
CON2	white cabbage	S5	AV	0.409591	0.0449994	0.0808565	0.0426322	0.232733	0.00336872	0.0287427	0.00612106	0.0250027	0.204762	0.031022	0.011842
			SD	0.0542415	0.0120637	0.0443532	0.00923808	0.0840838	0.000437662	0.0174472	5.35095e-05	0.00846034	0.0678575	0.00881186	0.00459001
CON2	white cabbage	S6	AV	0.608991	0.0928314	0.165637	0.0492174	0.37912	0.00715013	0.0568857	0.00617083	0.0237626	0.191277	0.0309628	0.00960704
			SD	0.0687493	0.0195086	0.0187094	0.00523195	0.0207559	0.00168053	0.00964488	0.000480457	0.0052155	0.0352031	0.00804468	0.00132901
ORG1	white cabbage	S1	AV	0.434312	0.0263071	0.0564946	0.0716262	0.639509	0.00894739	0.0739961	0.00462194	0.0198283	0.210414	0.061638	0.00737798
			SD	0.0981244	0.00345534	0.0144388	0.0242956	0.16544	0.00491586	0.0250225	0.00279569	0.0061925	0.0158324	0.0105865	0.00231802
ORG1	white cabbage	S2	AV	0.325401	0.0193086	0.0305188	0.038457	0.338716	0	0.0326825	0.00126881	0.0185204	0.313282	0.019674	0.0276936
			SD	0.148956	0.0123417	0.0126272	0.0315562	0.27699	0	0.0395828	0.00219765	0.00978498	0.0853445	0.00568172	0.0108064
ORG1	white cabbage	S3	AV	0.274627	0.0313196	0.0401068	0.0202286	0.297085	0.0025569	0.0522076	0.0066033	0.00770347	0.317617	0.0156248	0.0410575
			SD	0.0685975	0.0112429	0.0123215	0.00629406	0.0519827	0.00191587	0.00680744	0.00193698	0.00152757	0.0323032	0.00166877	0.00837794
ORG1	white cabbage	S4	AV	0.30006	0.0142107	0.0537694	0.0150449	0.342635	0.00173753	0.0370945	0.00929869	0.00416295	0.492335	0.0421259	0.0335397
			SD	0.0252321	0.00224057	0.00698121	0.00467951	0.0660878	0.00113993	0.0093782	0.00184841	0.00150091	0.122905	0.00838741	0.0104756
ORG1	white cabbage	S5	AV	0.237197	0.0294792	0.0434662	0.02043	0.309052	0.00451904	0.0565584	0.00612874	0.00741056	0.247499	0.0145209	0.0330767
			SD	0.158003	0.0239147	0.034397	0.00980069	0.121295	0.0051441	0.0309911	0.00253275	0.00123116	0.0692534	0.00522238	0.00701936
ORG1	white cabbage	S6	AV	0.175487	0.021105	0.0280465	0.0441582	0.249596	0.0124974	0.0428744	0.0059605	0.0101354	0.227165	0.0118974	0.0285485
			SD	0.00974063	0.00177463	0.00639379	0.0131635	0.0208397	0.00981685	0.00620148	0.00145393	0.00165337	0.0336175	0.00126672	0.00131673
IGZ	white cabbage	Dottenfelder Dauer, 29.10.2019	AV	1.00831	0.0129086	0.0330995	0.13794	1.01066	0.00274236	0.0171508	0.00428989	0.018322	0.18541	0.0591732	0.0241521
			SD	0.184578	0.000677324	0.0174863	0.073423	0.237103	0.000957728	0.00714384	0.00229062	0.00500945	0.0619109	0.0124391	0.00823764
CON1	red cabbage	S1	AV	0.270302	0.496607	0.989179	0.0207784	0.190558	0.0751348	0.925854	0.0149027	0.0336819	0.247393	0.0391693	0.00859101
			SD	0.0378823	0.090336	0.186985	0.00455729	0.0253385	0.0105032	0.0544699	0.00264287	0.00212702	0.0541245	0.00783466	0.00181424
CON1	red cabbage	S2	AV	0.214696	0.280667	0.399279	0.0241855	0.252877	0.0620734	0.380291	0.00520332	0.0464641	0.216198	0.0397357	0.00785657
			SD	0.0787913	0.361286	0.534828	0.00212387	0.0398516	0.0761134	0.35873	0.00901242	0.00914155	0.0611278	0.00955844	0.00244606
CON1	red cabbage	S3	AV	0.297769	0.269592	0.353107	0.0292926	0.311469	0.0622776	0.335098	0.0107432	0.0390503	0.220402	0.0457696	0.00454853
			SD	0.140556	0.249416	0.325338	0.0171704	0.229672	0.0254202	0.193594	0.00342932	0.0163042	0.0478578	0.013607	0.00081524
CON1	red cabbage	S4	AV	0.261932	0.126635	0.157949	0.0268732	0.397422	0.0384687	0.297	0.00686711	0.0380612	0.231242	0.0418517	0.0054382
			SD	0.0609503	0.0244283	0.0311787	0.00501591	0.14783	0.00820488	0.120358	0.00111878	0.0129435	0.008064	0.0105324	0.00141278
CON1	red cabbage	S5	AV	0.328277	0.394658	0.845075	0.0152475	0.231459	0.0666912	0.515374	0.00791459	0.0178891	0.145078	0.0205266	0.00437913
			SD	0.0673607	0.0507094	0.110225	0.0041807	0.044952	0.0367535	0.150402	0.00179491	0.00426748	0.0160588	0.0048509	0.00297789
CON1	red cabbage	S6	AV	0.274892	0.338011	0.608857	0.0176149	0.215119	0.112243	0.680315	0.0113119	0.0197606	0.326845	0.0331269	0.0163803
			SD	0.035648	0.0510405	0.0450508	0.00226605	0.0375387	0.0195426	0.066287	0.00111644	0.0027954	0.0381285	0.00498406	0.00896788
CON2	red cabbage	S1	AV	0.286961	0.207861	0.226654	0.0292112	0.279185	0.0729212	0.331963	0.0109709	0.0135043	0.164023	0.027222	0.00833644
			SD	0.0273251	0.130373	0.0872223	0.0164088	0.0421135	0.0538455	0.0814481	0.00255418	0.00428366	0.104347	0.00481977	0.00407712
CON2	red cabbage	S2	AV	0.167318	0.0583708	0.084272	0.0151135	0.165263	0.01856	0.0968608	0	0.0249628	0.240707	0.0338812	0.00871841
			SD	0.00698536	0.0238981	0.00348069	0.0043071	0.0492925	0.00783253	0.0353124	0	0.000962949	0.075269	0.00291542	0.00161037
CON2	red cabbage	S3	AV	0.184667	0.367088	0.401988	0.0103597	0.132977	0.0309305	0.423463	0.0137064	0.0236612	0.242848	0.0347525	0.00982281
			SD	0.0931783	0.269456	0.251121	0.00557081	0.047455	0.0185481	0.0884035	0.00265544	0.0144679	0.1718	0.00173749	0.00823011
CON2	red cabbage	S4	AV	0.226531	0.144269	0.177428	0.00826223	0.188769	0.0142623	0.293106	0.00555193	0.0187065	0.209504	0.0291341	0.00479309
			SD	0.0735172	0.0599216	0.146209	0.00273373	0.11346	0.00507503	0.230294	0.00184992	0.0188725	0.0366344	0.0235027	0.00141276
CON2	red cabbage	S5	AV	0.350446	0.32541	0.516095	0.0156418	0.168743	0.0393347	0.321282	0.00945914	0.0220918	0.137187	0.0285249	0.0028053
			SD	0.161431	0.220624	0.33735	0.00709794	0.0566938	0.0256236	0.146338	0.00391484	0.0086066	0.0647204	0.00896683	0.000695901
CON2	red cabbage	S6	AV	0.294595	0.137318	0.214423	0.0197147	0.200123	0.0469101	0.204852	0.0108955	0.0218046	0.143093	0.0576106	0.00498271
			SD	0.017292	0.055467	0.0667782	0.00226878	0.0426939	0.0278674	0.0702907	0.000543839	0.00236817	0.0106077	0.0270111	0.00288272
ORG1	red cabbage	S1	AV	0.192822	0.047284	0.0969482	0.0165102	0.192758	0.00746275	0.164879	0.00527431	0.00688376	0.348329	0.0335111	0.0114718
			SD	0.0197684	0.0025686	0.0235878	0.00304997	0.0284377	0.00246933	0.0339273	0.00134678	0.0011776	0.0951753	0.008624	0.00042455
ORG1	red cabbage	S2	AV	0.245177	0.0641762	0.151753	0.0155426	0.206394	0.00652635	0.206081	0.00275722	0.00986925	0.492409	0.0387412	0.0109425
			SD	0.0306543	0.0306426	0.0297468	0.000559517	0.0381225	0.00250234	0.0385341	0.00477564	0.000436386	0.0649493	0.00185156	0.00178307
ORG1	red cabbage	S3	AV	0.26984	0.228945	0.394227	0.0128579	0.231854	0.0176427	0.344178	0.00797882	0.0284112	0.340938	0.0272094	0.0115248
			SD	0.218183	0.318839	0.554404	0.00829628	0.0921361	0.0116189	0.306992	0.00418861	0.00693447	0.106966	0.00291153	0.00615396
ORG1	red cabbage	S4	AV	0.166346	0.0544755	0.0393005	0.0151325	0.144715	0.0164818	0.100697	0.00604952	0.0144819	0.228965	0.0278873	0.0100364
			SD	0.0468231	0.0261552	0.0265589	0.00782556	0.0729531	0.0192926	0.0879752	0.00328115	0.00648868	0.0538771	0.0101035	0.00471562
ORG1	red cabbage	S5	AV	0.0695024	0.0688355	0.0956443	0.0127085	0.122612	0.0199252	0.188826	0.00281492	0.00984038	0.343389	0.0140118	0.0169248
			SD	0.0362535	0.0228712	0.0342016	0.00278874	0.110684	0.00607576	0.0505933	0.00176791	0.00944561	0.0648919	0.00537597	0.00706256
ORG1	red cabbage	S6	AV	0.0430755	0.0714842	0.0798637	0.0119045	0.0572952	0.020615	0.167263	0.00295755	0.00587681	0.283246	0.0127821	0.00790487
			SD	0.0120672	0.0198243	0.0221732	0.00339732	0.0234024	0.0070894	0.055796	0.00101209	0.00162715	0.0491524	0.00282864	0.00232278
IGZ	red cabbage	Redma RZ F1, 10.10.2019	AV	0.287561	0.518524	0.939676	0.0101217	0.176545	0.0285139	1.11943	0.0141125	0.0289753	0.325012	0.0284444	0.00950652
			SD	0.0321933	0.0443635	0.0811515	0.000901462	0.0265171	0.00352338	0.155143	0.00201924	0.00594054	0.0614457	0.00304759	0.00196291
