# Supplementary material for: Seasonal Variation of Glucosinolate Hydrolysis Products in Commercial White and Red Cabbages (Brassica oleracea var. capitata)
Source: Foods. 2020 Nov 17;9(11):1682. doi: 10.3390/foods9111682 (PMC7698573; doi:10.3390/foods9111682)
Supplement: Supplementary file 1 [file foods-09-01682-s001.zip › TableS3.xlsx]

## Sheet: Table S3
				Allyl-CN	Allyl-ITC	CETP	3But-CN	3But-ITC	CETB	2OH3But-CN	CHETB A	CHETB B	OZT	3MTP-CN	3MTP-ITC	4MTB-CN	4MTB-ITC	3MSOP-CN	3MSOP-ITC	4MSOB-CN	4MSOB-ITC	5MSOP-ITC	2PE-CN	2PE-ITC	IAN		Sum ITC	% ITCs	Sum ETNs	% ETNs	Sum CN	% CNs	Sum Allyl	%AITC	%ACN	%CETP
Table S3: Glucosinolate (GLS) hydrolysis product formation in commercial and cabbages harvested freshly from the field in µmol/g fresh weight.
Abbreviations: AV: average; SD: standard deviation; ITC: isothiocyanate; CN: cyanide; ETN: epithionitrile; Allyl: allyl GLS; 3But: 3-butenyl GLS; 2OH3But: 2-hydroxy-3-butenyl GLS; 3MTP: 3-(methylsulfanyl)propyl GLS; 3MSOP: 3-(methylsulfinyl)propyl GLS; 4MTB: 4-(methylsulfanyl)butyl GLS; 4MSOB: 4-(methylsulfinyl)butyl GLS; 2PE: 2-phenylethyl GLS; I3M: indol-3-ylmethyl GLS; Allyl-CN: 3-butenenitril…
			precursor GLS	Allyl			3But			2OH3But				3MTP		4MTB		3MSOP		4MSOB		5MSOP	2PE		I3M
			µmol/g fresh weight	Allyl-CN	Allyl-ITC	CETP	3But-CN	3But-ITC	CETB	2OH3But-CN	CHETB A	CHETB B	OZT	3MTP-CN	3MTP-ITC	4MTB-CN	4MTB-ITC	3MSOP-CN	3MSOP-ITC	4MSOB-CN	4MSOB-ITC	5MSOP-ITC	2PE-CN	2PE-ITC	IAN		Sum ITC	% ITCs	Sum ETNs	% ETNs	Sum CN	% CNs	Sum Allyl	%AITC	%ACN	%CETP
CON1	white cabbage	S1	AV	0.0140351	0.0593945	0.121659	0.00206376	0.00566136	0.0143805	0.0131967	0.022042	0.0259434	0.000675821	0.00164615	0.00147579	0	0.000735079	0.0321725	0.17284	0.0228041	0.0620112	0	0.000949946	0.00217485	0.0014099		0.304968	52.7826	0.184025	31.9783	0.0882782	15.2391	0.195089	30.6155	7.18054	62.2039
			SD	0.00178476	0.00189453	0.0165933	0.000509462	0.000630869	0.0035348	0.0114295	0.00369708	0.00388639	0.000501594	0.000281078	0.000369974	0	0.0001604	0.00346947	0.0401208	0.00568382	0.0122902	0	0.00020171	0.000394824	0.000418783		0.0480316	7.01516	0.0270389	5.24082	0.0174785	2.30943	0.0191414	2.80308	0.244961	2.56236
CON1	white cabbage	S2	AV	0.0182278	0.0437525	0.184068	0.00349123	0.00399848	0.0210828	0.00981708	0.0302017	0.0383684	0.00560133	0.00229253	0.000861452	0.000404901	0.000920415	0.0403954	0.106116	0.0441543	0.0554858	0	0.00106867	0.00259083	0.00117743		0.219327	36.166	0.273721	44.3653	0.121029	19.4687	0.246049	18.157	7.08616	74.7568
			SD	0.00846419	0.00695136	0.0479553	0.001062	0.00251917	0.00388904	0.0170037	0.00669533	0.0083804	0.000395346	0.000782759	0.000156553	0.000412749	0.000486637	0.00217484	0.00212746	0.0196603	0.0237535	0	0.000628152	0.0013976	0.000909304		0.0195298	5.26339	0.0635255	6.15195	0.0384385	3.43701	0.0632155	2.21388	1.9103	0.734991
CON1	white cabbage	S3	AV	0.00763558	0.0449779	0.102863	0	0.00209264	0.00200495	0	0.00494932	0.00540218	0	0.00358836	0.0030616	0.000466951	0.00282905	0.0636555	0.0986082	0.0189611	0.0165697	0	0.000287847	0.00206863	0.000113532		0.170208	46.5354	0.11522	29.9711	0.0947089	23.4935	0.155477	30.0425	4.64225	65.3152
			SD	0.00664057	0.0172749	0.0330825	0	0.00145687	0.00191593	0	0.00552562	0.00481243	0	0.000783693	0.0032935	0.000808783	0.00139274	0.0286781	0.0382644	0.0133105	0.0110443	0	0.000498565	0.00135245	0.000196643		0.0343174	7.99454	0.0441696	1.96406	0.0500287	6.87187	0.033937	15.0315	4.24305	10.8091
CON1	white cabbage	S4	AV	0.0207641	0.0705031	0.256708	0	0.00075638	0.00148259	0.00358647	0.00324642	0.00374621	0	0.00843169	0.00437896	0	0	0.368866	0.396912	0.00822766	0	0	0	0.00131323	0.00378804		0.473863	40.9304	0.265183	22.9861	0.413664	36.0834	0.347975	20.0849	5.95194	73.9631
			SD	0.00358828	0.0478199	0.0459973	0	0.000655492	0.00131877	0.00621196	0.00280003	0.000869983	0	0.00131357	0.00339074	0	0	0.0339173	0.0865611	0.000630647	0	0	0	0.00114093	0.0054623		0.103425	6.73984	0.0498822	3.49173	0.0300916	4.24941	0.0245478	12.9349	0.7464	13.673
CON1	white cabbage	S5	AV	0.0233582	0.130839	0.318011	0	0.00122332	0.000698216	0	0.00110958	0	0	0.00879365	0.00615457	0	0	0.302687	0.356169	0.00592928	0.00171906	0	0	0.00115546	0.000618627		0.49726	42.5046	0.319819	27.8857	0.341387	29.6097	0.472208	27.6043	4.91386	67.4818
			SD	0.00476642	0.0537571	0.0552632	0	0.000589272	0.00120934	0	0.00192185	0	0	0.00193921	0.00320839	0	0	0.0808498	0.132677	0.00275693	0.00297749	0	0	0.00113602	0.000172635		0.193139	13.0221	0.0578608	5.61126	0.0879166	7.56082	0.05958	10.0997	0.396167	10.0812
CON1	white cabbage	S6	AV	0	0.0289069	0.100063	0	0.00438468	0.008298	0	0.0332226	0.0397933	0.0105555	0.00202788	0.00136278	0.000473299	0.00119463	0.189885	0.0696386	0.208795	0.0341654	0	0	0	0.00609921		0.150209	20.5089	0.181377	24.4685	0.40728	55.0226	0.12897	22.3183	0	77.6817
			SD	0	0.0059712	0.0137599	0	0.00144954	0.00276615	0	0.00954101	0.00794506	0.00155925	0.000320304	8.2479e-05	0.000819778	0.000209517	0.0158603	0.00627399	0.0447436	0.00259309	0	0	0	0.00316757		0.00453373	2.02095	0.0311649	0.935654	0.0632022	1.12235	0.0187499	2.26172	0	2.26172
CON2	white cabbage	S1	AV	0.019518	0.0292405	0.117818	0.00176534	0.00129505	0.0057525	0	0.0115819	0.010159	0	0.00299931	0.00127994	0	0.000527049	0.130588	0.178008	0.0504923	0.0192677	0	0.000638685	0.000491371	0.00190652		0.23011	38.4654	0.145311	25.2645	0.207909	36.27	0.166576	17.6953	11.6942	70.6105
			SD	0.00443807	0.00923691	0.0226114	0.000398796	0.000431302	0.00138564	0	0.00202975	0.00288014	0	0.000582943	0.00022087	0	6.36331e-05	0.0130112	0.0670118	0.00661781	0.0279667	0	7.67823e-05	0.000106413	0.000475213		0.101491	12.5237	0.0238865	5.48127	0.0185456	7.49545	0.0283032	5.9756	1.7223	4.26367
CON2	white cabbage	S2	AV	0.011358	0.0753016	0.141777	0	0.00390971	0.0043296	0	0.00514366	0.00367321	0.00261445	0.00502117	0.00581756	0.00108246	0.00281929	0.111281	0.373902	0.0306283	0.0599134	0.00188234	0.000274549	0.00242501	0.000146998		0.528585	63.0637	0.154923	18.2911	0.159792	18.6452	0.228436	34.4607	4.88341	60.6559
			SD	0.00353757	0.0177105	0.050013	0	0.00121835	0.00210807	0	0.00219415	0.00281123	0.00226792	0.00214819	0.00129031	0.000597691	0.00131566	0.042566	0.05591	0.0203817	0.0130396	0.00326031	0.000243755	0.000854659	0.000254608		0.0756194	11.3573	0.0537737	5.95583	0.0678051	6.41924	0.0359121	14.3579	0.846241	13.5148
CON2	white cabbage	S3	AV	0.0104866	0.0826427	0.0946073	0	0.00274384	0.00153784	0	0.00363194	0.00506089	0	0.00245016	0.0040994	0	0.000638214	0.106554	0.253383	0.0168897	0.0136869	0	0	0.000722014	0.00054243		0.357916	54.6329	0.104838	19.3996	0.136922	25.9675	0.187737	37.252	6.57137	56.1766
			SD	0.00358573	0.0889387	0.043099	0	0.000906309	0.00266361	0	0.00629071	0.00876571	0	0.00215424	0.00430175	0	0.00014742	0.0477698	0.231269	0.0134579	0.00956907	0	0	0.000671291	0.000708044		0.31786	13.2871	0.0435946	5.432	0.0500827	7.91353	0.133834	15.2956	2.21155	13.7241
CON2	white cabbage	S4	AV	0.0174542	0.0959415	0.256129	0	0.00109161	0.000903764	0	0.00384143	0.0049801	0	0.00668082	0.00537672	0	0.000909165	0.271938	0.277029	0.00955038	0	0	0	0.00177914	0.00084111		0.382127	39.8323	0.265854	27.9782	0.306465	32.1895	0.369524	25.8818	4.71645	69.4017
			SD	0.00180493	0.0220409	0.0150984	0	0.000452806	0.00156536	0	0.000719388	0.000618052	0	0.000942699	0.00136346	0	0.000101847	0.0190079	0.056214	0.00993297	0	0	0	0.000317042	0.00145684		0.0750521	5.57007	0.0159904	3.17132	0.0256673	3.45486	0.0115419	5.25826	0.350453	5.44979
CON2	white cabbage	S5	AV	0.014591	0.05226	0.198581	0	0.00366447	0.00700098	0.00445715	0.013696	0.0190347	0	0.00546263	0.00301707	0	0.000710271	0.101131	0.0835991	0.00902863	0.00380606	0	0	0.00142811	0.00156602		0.148485	27.8821	0.238313	46.1687	0.136237	25.9492	0.265432	19.8491	5.50711	74.6438
			SD	0.00304656	0.0240942	0.0301704	0	0.00323261	0.00182922	0.00772001	0.00397715	0.00477759	0	0.00287252	0.00320434	0	4.95525e-05	0.0158953	0.0319426	0.00324809	0.00381541	0	0	5.92129e-05	0.00271242		0.0588204	9.14282	0.0294935	9.93616	0.0246901	2.7324	0.0120054	9.34495	1.20445	8.63385
CON2	white cabbage	S6	AV	0.020171	0.103005	0.226489	0	0.0124607	0.012983	0	0.028214	0.0245043	0.0200373	0.00507947	0.0044836	0	0.000978373	0.16093	0.167028	0.0325767	0.010361	0	0	0.00136007	0.00205479		0.319714	39.4101	0.29219	34.8236	0.220812	25.7664	0.349665	30.048	5.84993	64.102
			SD	0.00351856	0.0152801	0.0564082	0	0.0027982	0.0058993	0	0.00825445	0.0062682	0.0060884	0.00205375	0.000798409	0	0.000847588	0.0655047	0.00922008	0.0229159	0.00905245	0	0	0.000261874	0.00130733		0.0230106	8.79682	0.0685221	2.32753	0.0926179	6.73925	0.0522329	7.04759	1.23916	7.33095
ORG1	white cabbage	S1	AV	0.0201041	0.169554	0.14869	0	0.00282111	0.003263	0	0.00551869	0.00565899	0.00413761	0.00787786	0.0225565	0.000432094	0.00478361	0.11185	0.699541	0.0131167	0.0531608	0	0.000365493	0.00412009	0.000535259		0.960675	75.1146	0.16313	12.7797	0.154282	12.1057	0.338348	50.2836	5.94221	43.7742
			SD	0.00433123	0.0244369	0.0307951	0	0.000570917	0.000491373	0	0.00150243	0.0012433	0.00104633	0.00254853	0.00772726	0.000391953	0.00234721	0.014679	0.0950716	0.00335126	0.0147301	0	8.38287e-05	0.00135113	0.000472312		0.139369	3.27474	0.0333347	1.95613	0.0238002	1.33453	0.0564765	3.19212	0.92541	2.42467
ORG1	white cabbage	S2	AV	0.0178691	0.0429944	0.17665	0	0.00202463	0.00338874	0	0.0029899	0.00238136	0	0.00553446	0.0026077	0	0.000142557	0.187834	0.500715	0.0362351	0.042413	0	0.000119037	0	0.00348418		0.590897	43.5456	0.18541	38.0369	0.251076	18.4175	0.237513	17.4175	7.33691	75.2456
			SD	0.00795316	0.0432178	0.0502793	0	0.00223576	0.00228056	0	0.00196961	0.00116472	0	0.00473457	0.0035921	0	0.000246916	0.231669	0.54334	0.0590722	0.065098	0	0.000206179	0	0.00259897		0.621875	32.8153	0.0544144	41.1257	0.302384	9.82692	0.0561273	19.1781	1.63115	18.4072
ORG1	white cabbage	S3	AV	0.00843906	0.00171453	0.0852709	0	0	0.00177003	0	0.0012058	0	0	0.00231518	0	0	0	0.0820959	0.0260051	0.0201307	0	0	0.000442451	0	0.00319151		0.0277196	11.626	0.0882467	38.5891	0.116615	49.7849	0.0954245	1.689	8.88418	89.4268
			SD	0.000952435	0.00296965	0.00435263	0	0	0.00306578	0	0.00208851	0	0	0.000141117	0	0	0	0.0220686	0.00847423	0.00919776	0	0	0.000766348	0	0.0011833		0.0114073	2.28342	0.00826597	4.52948	0.0306393	2.76336	0.00596871	2.92544	1.36498	2.83547
ORG1	white cabbage	S4	AV	0.0159327	0.0554013	0.137767	0	0.00155133	0.00240963	0	0.00735722	0.00986011	0	0.00387934	0.00250525	0	0	0.237451	0.408148	0.0325489	0.0237953	0.0040323	0	0.000284657	0.00337622		0.495718	53.1027	0.157394	15.8879	0.293188	31.0094	0.209101	29.2168	7.3455	63.4377
			SD	0.0092495	0.00707276	0.0816816	0	0.000362363	0.00417361	0	0.0029169	0.0033783	0	0.00260181	0.000667944	0	0	0.0925031	0.116487	0.0185972	0.016913	0.00350163	0	0.000493041	0.000403152		0.135967	13.0076	0.0900622	5.337	0.120888	9.48995	0.0944934	9.31783	0.918689	8.47389
ORG1	white cabbage	S5	AV	0.0119285	0.0119757	0.0928516	0	0.00108922	0.00374322	0	0.00719888	0.00967845	0	0.0023795	0.000469304	0.00039496	0.000613377	0.210189	0.0252039	0.0524358	0.00124124	0.00275621	0.000423384	0.000622392	0.00779909		0.0439713	8.95639	0.113472	25.9179	0.28555	65.1257	0.116756	8.41293	10.2974	81.2897
			SD	0.0038051	0.0134171	0.0218173	0	0.00188659	0.00147657	0	0.00524749	0.0028516	0	0.000970484	0.000455004	0.000684091	0.000550954	0.0244724	0.0163773	0.0337298	0.00214989	0.00477389	0.000733323	0.000539409	0.00480922		0.0384109	5.46904	0.0283764	4.90895	0.0632787	6.80471	0.0375958	8.80776	0.992223	8.69879
ORG1	white cabbage	S6	AV	0.00675321	0.0099375	0.0869898	0	0.000296213	0.00465811	0	0.00183843	0.00291283	0	0.00834355	0	0.00167416	0	0.161265	0.00998063	0.0252418	0	0.00157361	0.000265627	0	0.00531957		0.021788	6.67207	0.0963992	29.4265	0.208863	63.9015	0.103681	9.96524	5.70265	84.3321
			SD	0.00587298	0.00120488	0.0242641	0	0.000263057	0.00284073	0	0.00318425	0.00504516	0	0.00476984	0	0.00147589	0	0.0503695	0.00427422	0.0128721	0	0.00272558	0.000460079	0	0.00266585		0.00746843	0.57326	0.0345082	0.800779	0.0739413	1.35511	0.0305786	1.9514	4.97041	3.73399
IGZ	white cabbage	Dottenfelder Dauer, 29.10.2019	AV	0.0382335	0.171359	0.529256	0.000785381	0.00148845	0.00303963	0	0.00157233	0.00119668	0	0.0269552	0.0128711	9.68189e-05	0	0.499419	0.27363	0.00352818	0	0	0	0	0.0240702		0.459349	29.9792	0.535065	33.6136	0.593089	36.4073
			SD	0.0122336	0.0602221	0.190287	0.00158879	0.000586228	0.00247605	0	0.00218939	0.00185507	0	0.016852	0.00671282	0.000273845	0	0.215825	0.079206	0.00314481	0	0	0	0	0.0284814		0.131501	8.81585	0.195892	6.78294	0.250851	12.5048
CON1	red cabbage	S1	AV	0	0.0599327	0.0614166	0.00392404	0.0550197	0.0780887	0.0576	0.0755855	0.0841348	0.274072	0.00198423	0.0012175	0.00976707	0.0287826	0.00612078	0.208808	0.170204	1.05915	0.0297556	0.00172009	0.00923236	0		1.72986	75.3709	0.299226	13.4948	0.25132	11.1342	0.121349	48.3125	0	51.6875
			SD	0	0.0280484	0.0196934	0.00169055	0.0567473	0.0464238	0.004835	0.0159975	0.0162094	0.13821	0.000957363	0.00210877	0.00609569	0.0206576	0.000908017	0.0373888	0.0174212	0.249593	0.00688483	0.000689668	0.00587674	0		0.366359	7.13464	0.0914889	5.46548	0.0210397	1.66919	0.0359995	11.8853	0	11.8853
CON1	red cabbage	S2	AV	0.00324936	0.0341008	0.0644416	0.00189395	0.0485958	0.0307354	0	0.0240742	0.0287832	0.0697105	0.00293369	0.00234986	0.00547945	0.0260496	0.0465932	0.235887	0.0986874	0.454285	0.00964004	0.000908734	0.0021866	0.000644453		0.883309	69.6079	0.148034	13.9856	0.16039	16.4065	0.101792	32.9446	3.31903	63.7364
			SD	0.00333046	0.023693	0.0191813	0.00193757	0.0763331	0.0320668	0	0.0250249	0.0286859	0.120742	0.00188753	0.00181085	0.00651229	0.0394046	0.0220993	0.0272563	0.0705517	0.523515	0.016697	0.000443623	0.00267031	0.000445869		0.809188	9.30968	0.0806102	3.74367	0.0589844	5.7569	0.0189624	18.9712	3.08707	15.9022
CON1	red cabbage	S3	AV	0.00199514	0.032411	0.0717691	0.00300733	0.0323907	0.0654535	0	0.0414526	0.0522656	0.02232	0.00238524	0.00119025	0.0055548	0.00821416	0.0584489	0.123459	0.14453	0.202163	0	0.000736491	0.00142982	0.000130071		0.423578	52.2443	0.230941	20.6103	0.216788	27.1454	0.106175	30.6688	1.08589	68.2454
			SD	0.00345568	0.0208812	0.0439743	0.00520885	0.048839	0.105164	0	0.0670422	0.0830868	0.0320305	0.000968863	0.000489932	0.00565725	0.00766156	0.012296	0.0688132	0.163442	0.2142	0	0.00127564	0.00187411	0.00022529		0.309118	16.7613	0.299049	12.0478	0.17184	9.78501	0.0671671	8.39354	1.88082	8.52602
CON1	red cabbage	S4	AV	0.00979168	0.0456125	0.184005	0	0.0143032	0.0317322	0	0.0410621	0.0247167	0.0127545	0.00591202	0.00311476	0.00592476	0.00621703	0.318735	0.21356	0.408174	0.176258	0	0	0.000890967	0.000273565		0.472711	31.4796	0.281516	18.7426	0.748811	49.7779	0.239409	20.3547	4.08207	75.5632
			SD	0.00176961	0.036142	0.0637995	0	0.0136321	0.0149841	0	0.00906775	0.0118837	0.0110677	0.00291824	0.00245912	0.00298902	0.00413842	0.0542647	0.0786208	0.103305	0.0631297	0	0	0.000911451	0.000473829		0.205396	13.6059	0.086866	5.37666	0.159127	8.24516	0.037941	18.7054	0.247282	18.4793
CON1	red cabbage	S5	AV	0.0125395	0.0135483	0.309159	0.0126007	0.00676477	0.272254	0.14391	0.289547	0.323223	0.0269319	0.00668235	0.000367119	0.0321409	0.00547536	0.179619	0.0270346	0.897554	0.117888	0	0.0032782	0.00195487	0.0022366		0.199965	7.41809	1.19418	45.4544	1.29056	47.1275	0.335247	4.08908	3.71179	92.1991
			SD	0.00402847	0.00296834	0.0879347	0.00372713	0.00176719	0.0626203	0.0237008	0.0476795	0.0600099	0.00413404	0.00302831	0.000245972	0.0223817	0.00356788	0.0566385	0.00704962	0.354331	0.0492845	0	0.000569666	0.000402182	0.000313591		0.0604761	1.54639	0.175831	8.98076	0.438619	7.89244	0.0947765	0.35805	0.195749	0.390099
CON1	red cabbage	S6	AV	0.00333873	0.00978942	0.223173	0.011363	0.00599279	0.200779	0	0.172668	0.189764	0.0249691	0.00605933	0	0.0328988	0.00302967	0.153918	0.0282236	1.11431	0.105109	0	0.00324915	0.000260259	0.00361398		0.17777	7.59291	0.786384	34.5064	1.32875	57.9007	0.236301	4.22165	1.26605	94.5123
			SD	0.00578286	0.00226955	0.0205519	0.00165713	0.00197032	0.0151212	0	0.0274989	0.0243163	0.00674661	0.00179285	0	0.0158706	0.00267506	0.0345452	0.0134799	0.179852	0.0478132	0	0.000716348	0.000450782	0.0008338		0.0649468	1.78167	0.0858866	2.9179	0.214564	1.31851	0.0242682	1.33365	2.19287	1.50259
CON2	red cabbage	S1	AV	0.0139376	0.070889	0.142472	0.00599757	0.0151939	0.0780422	0	0.0513011	0.0598828	0.0155625	0.0062299	0.00212337	0.0127791	0.0144574	0.0581214	0.230076	0.235754	0.319431	0.0073422	0.00152411	0.00566441	0.000128397		0.680739	51.8618	0.331698	23.8135	0.334472	24.3247	0.227298	31.4916	6.19737	62.3111
			SD	0.00193568	0.0164305	0.0317456	0.00378581	0.0164981	0.061205	0	0.0266301	0.0305248	0.00437635	0.00420934	0.000855455	0.0107044	0.00801539	0.0476639	0.112745	0.13373	0.0554168	0.00846508	0.000533596	0.00179188	0.000222389		0.0562603	12.7309	0.14712	7.72232	0.113302	5.03163	0.0189015	8.84444	1.28199	9.9858
CON2	red cabbage	S2	AV	0.00458789	0.0136133	0.072326	0	0.0029643	0.00785347	0.00277503	0.0147229	0.0192459	0.00514739	0.00287517	0.00054686	0.00201943	0.00234799	0.0536177	0.136491	0.0705344	0.108947	0.000996629	0.000482484	0.000599232	0.000862373		0.271653	51.5846	0.114148	22.4886	0.137754	25.9267	0.0905272	16.5201	4.98035	78.4995
			SD	0.00162117	0.00851597	0.0231393	0	0.00198116	0.00420299	0.00480648	0.000779428	0.00210546	0.00569201	0.00159201	0.000474161	0.00104194	0.00139379	0.0229588	0.0614451	0.0347766	0.0602767	0.00172621	2.12962e-05	0.000185005	0.00122044		0.126743	15.3549	0.0288368	5.9237	0.0652373	10.6308	0.0169296	12.3732	0.94646	11.5298
CON2	red cabbage	S3	AV	0.00225856	0.0429065	0.0920929	0	0.0447043	0.0900832	0	0.0778426	0.093152	0.038091	0.00151452	0.000935979	0.00447228	0.00494446	0.0423837	0.093588	0.250979	0.334351	0	0.00111957	0.00236446	0		0.561885	44.068	0.353171	29.9591	0.302727	25.9728	0.137258	27.5871	1.30104	71.1119
			SD	0.00391193	0.0351845	0.00757804	0	0.0341023	0.038656	0	0.0326589	0.0376346	0.0212945	0.00136825	0.000726508	0.00309648	0.00336732	0.00341837	0.0874861	0.0834251	0.179631	0	0.000969651	0.000755217	0		0.345276	21.9554	0.112419	11.7104	0.0879229	11.51	0.0405609	18.6494	2.25347	20.4821
CON2	red cabbage	S4	AV	0.0096919	0.025106	0.190873	0.00604466	0.00784517	0.0461004	0	0.0622869	0.0687594	0.0158918	0.00215781	0.000438959	0.00158346	0.00126913	0.196967	0.0851955	0.555379	0.101328	0	0.00158827	0.00113352	0.000729942		0.238208	18.6986	0.368019	25.7104	0.774143	55.591	0.22567	10.674	4.5163	84.8097
			SD	0.00371628	0.0179046	0.0832544	0.00523501	0.00609164	0.0390148	0	0.0409628	0.0380756	0.0137994	0.000554692	0.000760299	0.00151241	0.00119416	0.0459008	0.067236	0.312224	0.0525229	0	0.00048844	0.00114861	0.000656504		0.152176	15.1596	0.197577	3.83819	0.36136	14.8653	0.0955472	7.67877	1.46194	6.3298
CON2	red cabbage	S5	AV	0.0100422	0.0576984	0.270598	0.00972068	0.0377152	0.207456	0.0471268	0.179149	0.199727	0.0381535	0.00613142	0.00195444	0.0158099	0.00977929	0.15114	0.0582413	0.553537	0.13624	0.00382133	0.0030129	0.0030621	0.00124208		0.346665	19.4535	0.85693	39.3327	0.797764	41.2138	0.338339	22.6979	2.35885	74.9432
			SD	0.0087721	0.0177559	0.155911	0.00591089	0.0125661	0.167769	0.0816261	0.118761	0.123979	0.0218716	0.00461199	0.000444859	0.0142896	0.00482525	0.0545158	0.0247795	0.222038	0.0959845	0.00661873	0.00264328	0.00206859	0.00109714		0.168681	8.8508	0.554292	13.0532	0.368867	4.37246	0.151277	19.4002	2.04673	17.3852
CON2	red cabbage	S6	AV	0.00987586	0.0260812	0.22267	0.00392975	0.00847978	0.0475435	0	0.0616648	0.0723186	0.0135599	0.00562053	0.0011615	0.0085268	0.0040057	0.145492	0.0316809	0.301719	0.0316894	0.00613124	0.00292862	0.00114333	0.000955883		0.123933	11.8118	0.404197	42.2488	0.479049	45.9395	0.258627	10.0551	3.8175	86.1274
			SD	0.00138053	0.016725	0.0259807	0.00171382	0.00742518	0.0260464	0	0.0255899	0.0294166	0.0122465	0.00231111	0.00106635	0.00618223	0.00359668	0.019315	0.0225252	0.224426	0.0185614	0.0053107	0.000807236	0.000997849	0.00100205		0.0725638	6.01975	0.0532291	9.82793	0.239775	7.69896	0.0253568	6.19999	0.340931	6.54083
ORG1	red cabbage	S1	AV	0.00740883	0.0510322	0.060256	0	0.00365278	0.00429272	0	0.0162955	0.0205254	0.00963631	0.00165822	0.0020674	0.00137493	0.00805834	0.0481642	0.280848	0.0752235	0.238904	0	0.000459794	0.00284755	0.000689102		0.597046	71.6026	0.10137	12.1628	0.134979	16.2345	0.118697	42.0892	6.57283	51.3379
			SD	0.0011966	0.0181552	0.00884263	0	0.00157167	0.000574769	0	0.00130132	0.000621936	0.00153559	0.000861104	0.0018444	0.000796127	0.00646632	0.00185586	0.0387069	0.00499862	0.00587815	0	9.78782e-05	0.0014188	5.49146e-05		0.039569	1.2411	0.011215	1.15185	0.00590349	1.28169	0.0258683	6.73417	2.46911	4.2651
ORG1	red cabbage	S2	AV	0.0202712	0.0769979	0.194089	0	0.00941202	0.0122968	0	0.0261681	0.0332064	0.00716708	0.00251794	0.000712762	0.00181135	0.00360577	0.120219	0.465792	0.214104	0.440743	0	0.000730739	0.00180962	0.00590464		1.00624	59.9583	0.265761	16.6283	0.365559	23.4134	0.291358	24.2633	6.59242	69.1443
			SD	0.0122025	0.0531649	0.0248767	0	0.0063983	0.000899733	0	0.00456834	0.00908003	0.00767858	0.00103384	0.00082366	0.000911586	0.00256844	0.015569	0.151354	0.0201004	0.162735	0	0.000181445	0.00120634	0.00346149		0.365541	9.48176	0.0294934	2.58151	0.00820474	6.93611	0.0891967	11.4375	1.95334	12.8774
ORG1	red cabbage	S3	AV	0.00306103	0.0112301	0.0181368	0	0.00354265	0.000324643	0	0	0	0	0	0	0	0	0.0113325	0.0395558	0.0399445	0.0612431	0	0	0	0		0.115572	58.2035	0.0184614	13.363	0.0543381	28.4335	0.0324279	30.7822	12.356	56.8618
			SD	0.00273014	0.0108552	0.0065873	0	0.00254246	0.000562298	0	0	0	0	0	0	0	0	0.00243544	0.0269436	0.0475541	0.0648433	0	0	0	0		0.0738376	19.1144	0.00670672	9.46567	0.0503532	16.475	0.0137203	18.146	10.7019	9.777
ORG1	red cabbage	S4	AV	0.0130403	0.0389829	0.0895821	0	0.00340917	0.00266868	0	0.00858563	0.0106399	0.00928875	0.00282538	0.00248121	0.00110909	0.00328799	0.130754	0.137937	0.156183	0.102456	0	0	0.00168539	0.00163442		0.299528	39.8084	0.111476	21.9263	0.305546	38.2653	0.141605	26.9779	9.47395	63.5481
			SD	0.00306048	0.0157525	0.023624	0	0.00233327	0.00231335	0	0.00800679	0.0110299	0.0109221	0.00128018	0.00158799	0.000965349	0.00201798	0.0887588	0.0975463	0.18103	0.0893378	0	0	0.000525045	0.00222213		0.194252	13.5046	0.0215843	17.1359	0.267345	16.2668	0.0381651	6.35864	2.17134	4.2833
ORG1	red cabbage	S5	AV	0.00424039	0.011362	0.0604698	0.00582171	0.00523637	0.0280621	0	0.020247	0.0208313	0.00308038	0.00234267	0.000500553	0.00282909	0.00172918	0.152989	0.10624	0.448252	0.129249	0.00231738	0	0	0.00247791		0.259715	21.1138	0.12961	14.6703	0.618953	64.2159	0.0760722	7.18576	2.68178	90.1325
			SD	0.00734458	0.0196796	0.044046	0.000825936	0.00415123	0.00833401	0	0.00382311	0.00797015	0.00533538	0.000331676	0.000564829	0.000295094	0.00101002	0.161258	0.147407	0.143227	0.110279	0.00401382	0	0	0.00179044		0.28538	11.7195	0.0327489	4.52777	0.297601	7.53157	0.0710641	12.4461	4.64498	17.0911
ORG1	red cabbage	S6	AV	0	0.00594783	0.0204673	0.00339143	0.00524296	0.0126687	0	0.0103693	0.0130989	0.0023812	0.00039764	0	0.000843623	0.00180335	0.0221813	0.0177513	0.157082	0.0662539	0	0	0.000368334	0.000708149		0.0997489	27.046	0.0566043	17.2017	0.184605	55.7523	0.0264151	19.5429	0	80.4571
			SD	0	0.00515148	0.00317811	0.000281743	0.00329356	0.0018237	0	0.00508237	0.00487776	0.00412435	0.000688733	0	0.000730998	0.000904663	0.00419748	0.0111885	0.030952	0.0497639	0	0	0.000319491	0.00122655		0.0700772	10.2937	0.00952376	3.14086	0.0332436	7.46494	0.00766623	17.055	0	17.055
IGZ	red cabbage	Redma RZ F1, 10.10.2019	AV	0.00931457	0.0150793	0.199395	0.0165979	0.0224796	0.2195	0.0191331	0.277609	0.320857	0.0499225	0.00257052	7.86576e-05	0.00826969	0.00171557	0.121827	0.0582143	1.679	0.545651	0.00145623	0.00435559	0.000911182	0.0041191		0.695508	19.5715	1.01736	28.4174	1.86519	52.0111
			SD	0.000825536	0.009399	0.0192553	0.00219116	0.0142861	0.0446947	0.0541166	0.0224014	0.0249074	0.0119731	0.000322956	0.000222477	0.00296105	0.00104693	0.00669746	0.0102002	0.196716	0.0726898	0.00411883	0.000724739	0.00118663	0.00130525		0.112794	3.92845	0.103612	2.16369	0.212466	3.34115
