# Supplementary material for: Seasonal Variation of Glucosinolate Hydrolysis Products in Commercial White and Red Cabbages (Brassica oleracea var. capitata)
Source: Foods. 2020 Nov 17;9(11):1682. doi: 10.3390/foods9111682 (PMC7698573; doi:10.3390/foods9111682)
Supplement: Supplementary file 1 [file foods-09-01682-s001.zip › TableS4.xlsx]

## Sheet: Table S4
Table S4: Climatic data of the Dithmarschen region in northern Germany in 2019. Abbreviation: AV: average.
Elpersbüttel (Dithmarschen, Schleswig-Holstein), Germany
source: https://www.wetterkontor.de/de/wetter/deutschland/rueckblick.asp?id=52, accessed 05.11.2020
2019	AV T (min) [°C]	AV T (max) [°C]	AV T (average) [°C]	precipitation per month (L/m2)	AV sunshine (h/d)	AV Wind (Bft)
May	6.20323	14.9774	11	39.1	6.69355	6.03226
June	11.8067	22.9767	17.6833	66.3	8.86	5.6
July	13.9677	21.471	17.6226	43.3	5.90645	5.77419
August	13.4742	23.2903	18.4645	51.9	7.32581	5.6129
September	10.6867	18.2067	14.4933	117.7	4.76333	6
October	7.44194	13.7645	10.6452	92.9	3.12581	5.74194
November	3.39667	8.05333	5.85667	64.8	1.29667	5.16667
